# Supplementary material for: Selective synthesis of trienes and dienes via nickel-catalyzed intermolecular cotrimerization of acrylates and alkynes
Source: Royal Society of Chemistry journal article supplement (doi:10.1039/c0cc01754j), 2010-01-01
Supplement: c0cc01754j.pdf [file c0cc01754j.pdf]

*Supporting Information for:*

**Selective Synthesis of Dienes and Trienes via Nickel-Catalyzed  
Intermolecular Cotrimerization of Acrylates and Alkynes**

Hiroaki Horie, Takuya Kurahashi\*, and Seiji Matsubara\*

*Department of Material Chemistry, Graduate School of Engineering, Kyoto University,  
Kyoto-daigaku Katsura, Nishikyo-ku, Kyoto 615-8510, Japan*

**Contents**

|                                                                      |     |
|----------------------------------------------------------------------|-----|
| <b>Instrumentation and Chemicals</b>                                 | S2  |
| <b>Experimental Procedure and Characterization Data for Products</b> | S3  |
| <b>NMR Spectra of Products</b>                                       | S14 |
| <b>Optimization of the Reaction Conditions</b>                       | S35 |

## Instrumentation and Chemicals

All manipulations of oxygen- and moisture-sensitive materials were conducted in a dry box or with a standard Schlenk technique under a purified argon atmosphere. Nuclear magnetic resonance spectra were taken on Varian UNITY INOVA 500 ( $^1\text{H}$ , 500 MHz;  $^{13}\text{C}$ , 125.7 MHz) spectrometer using tetramethylsilane ( $^1\text{H}$ ) as an internal standard.  $^1\text{H}$  NMR data are reported as follows: chemical shift, multiplicity (s = singlet, d = doublet, t = triplet, q = quartet, quint = quintet, sext = sextet, sept = septet, br = broad, m = multiplet), coupling constants (Hz), integration, and identification. GC-MS analyses and High-resolution mass spectra were obtained with a JEOL JMS-700 spectrometer by electron ionization at 70 eV. Preparative recycling gel permeation chromatography (GPC) was performed with JAI LC-908 equipped with JAIGEL-1H and -2H columns (toluene as an eluent). Elemental analyses were carried out with a YANAKO MT2 CHN CORDER machine at Kyoto University Elemental Analysis Center. Infrared spectra (IR) spectra were determined on a SHIMADZU FTIR-8200PC spectrometer. In-situ IR spectra were obtained with Mettler Toledo ReactIR 45M equipped with AgX Fiber (9.5 mm). Melting points were determined using a YANAKO MP-500D. TLC analyses were performed by means of Merck Kieselgel 60 F<sub>254</sub> (0.25 mm) Plates. Visualization was accomplished with UV light (254 nm) and/or an aqueous alkaline  $\text{KMnO}_4$  solution followed by heating. Flash column chromatography was carried out using Kanto Chemical silica gel (spherical, 40–50  $\mu\text{m}$ ). Unless otherwise noted, commercially available reagents were used without purification. Toluene was purchased from Wako Pure Chemical Co. stored over slices of sodium. Bis(1,5-cyclooctadiene)nickel and ligands were purchased from Strem Chemicals, Inc.

## Experimental Procedure and Characterization Data for Products

### General procedure for the nickel-catalyzed synthesis of conjugated diene.

**Method A.** The reaction was performed in a 5 mL sealed vessel equipped with a Teflon-coated magnetic stirrer tip. An acrylate (2.0 mmol, 2.0 equiv.) and an alkyne (0.50 mmol) were added to a solution of bis(1,5-dicyclooctadiene)nickel (6.8 mg, 0.025 mmol), 1,3-bis(2,6-diisopropylphenyl)imidazolium chloride (21 mg, 0.050 mmol) and potassium *tert*-butoxide (6.2 mg, 0.055 mmol) in 1,4-dioxane (2 mL) in a dry box. The VIAL was taken outside the dry box and heated at 100 °C for 24 h. The resulting reaction mixture was cooled to ambient temperature and filtered through a silica gel pad, concentrated *in vacuo*. The residue was purified by flash silica gel column chromatography (hexane/ethyl acetate = 10:1) to give the corresponding conjugated diene.

**Method B.** The reaction was performed in a 15 mL sealed tube equipped with a Teflon-coated magnetic stirrer. An acrylate (2.0 mmol, 2.0 equiv.) was added to a solution of bis(1,5-dicyclooctadiene)nickel (14 mg, 0.050 mmol), 1,3-bis(2,6-diisopropylphenyl)-imidazolium chloride (43 mg, 0.10 mmol) and potassium *tert*-butoxide (12 mg, 0.11 mmol) in 1,4-dioxane (0.5 mL) in a dry box and the VIAL was taken outside the dry box. To the mixture was added dropwise a solution of alkyne (0.50 mmol) in 1,4-dioxane (1.5 mL) at 100 °C over a period of 20 h. The resulting mixture was stirred for 4 h and cooled to ambient temperature and filtered through a silica gel pad, concentrated *in vacuo*. The residue was purified by flash silica gel column chromatography (hexane/ethyl acetate = 10:1) to give the corresponding conjugated diene.

### Diethyl (2*E*,4*Z*)-4,5-dipropyl-2,4-octadienedioate (3aa).

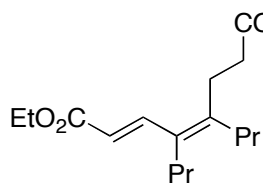

Yield: 82% (Method A), colorless oil. <sup>1</sup>H NMR (500 MHz, CDCl<sub>3</sub>): δ 7.71 (d, *J* = 15.5 Hz, 1H), 5.85 (d, *J* = 15.5 Hz, 1H), 4.21 (q, *J* = 7.0 Hz, 2H), 4.12 (q, *J* = 7.0 Hz, 2H), 2.62 (t, *J* = 8.0 Hz, 2H), 2.38 (t, *J* = 8.0 Hz, 2H), 2.21 (t, *J* = 8.0 Hz, 2H), 2.15 (t, *J* = 8.0 Hz, 2H), 1.44 (m, 2H), 1.38 (m, 2H), 1.31 (t, *J* = 7.0 Hz, 3H), 1.25 (t, *J* = 7.0 Hz, 3H), 0.95 (t, *J* = 7.0 Hz, 3H), 0.93 (t, *J* = 8.0 Hz, 3H). <sup>13</sup>C NMR (125 MHz, CDCl<sub>3</sub>): δ 172.70, 167.88, 147.45, 142.00, 132.30, 116.71, 60.51, 60.18, 35.55, 34.31, 30.26, 27.28, 22.49, 21.97, 14.39, 14.35, 14.30, 14.18. IR (neat): 2961, 2907,

1732, 1712, 1614, 1466, 1300, 1261, 1177, 1040, 980, 860, 739  $\text{cm}^{-1}$ . MS (EI):  $m/z$  (%): 310 ( $[\text{M}]^+$ , 38), 267 ( $[\text{M}-\text{Pr}]^+$ , 47), 264 (61), 236 ( $[\text{M}-\text{CO}_2\text{Et}-\text{H}]^+$ , 100), 219 (73), 189 (80), 163 (86). HRMS calcd for  $\text{C}_{18}\text{H}_{30}\text{O}_4$ : 310.2144. Found: 310.2140.

**Dimethyl (2*E*,4*Z*)-4,5-dipropyl-2,4-octadienedioate (3ba).**

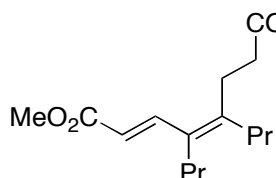

Yield: 71% (Method A), colorless oil.  $^1\text{H}$  NMR (500 MHz,  $\text{CDCl}_3$ ):  $\delta$  7.68 (d,  $J = 15.5$  Hz, 1H), 5.84 (d,  $J = 15.5$  Hz, 1H), 3.74 (s, 3H), 3.65 (s, 3H), 2.60 (t,  $J = 8.0$  Hz, 2H), 2.38 (t,  $J = 8.0$  Hz, 2H), 2.18 (t,  $J = 8.0$  Hz, 2H), 2.12 (t,  $J = 8.0$  Hz, 2H), 1.42 (m, 2H), 1.35 (m, 2H), 0.93 (t,  $J = 7.0$  Hz, 3H), 0.90 (t,  $J = 7.0$  Hz, 3H).  $^{13}\text{C}$  NMR (125 MHz,  $\text{CDCl}_3$ ):  $\delta$  173.03, 168.21, 147.50, 142.07, 132.30, 116.27, 51.60, 51.42, 35.50, 33.98, 30.17, 27.23, 22.42, 21.92, 14.35, 14.24. IR (neat): 2959, 2872, 1741, 1715, 1614, 1435, 1304, 1265, 1171, 1022, 860, 739  $\text{cm}^{-1}$ . MS (EI):  $m/z$  (%): 282 ( $[\text{M}]^+$ , 16), 239 ( $[\text{M}-\text{Pr}]^+$ , 42), 222 ( $[\text{M}-\text{CO}_2\text{Me}-\text{H}]^+$ , 100), 189 (53), 163 (60). HRMS calcd for  $\text{C}_{16}\text{H}_{26}\text{O}_4$ : 282.1831. Found: 282.1842. Anal calcd for  $\text{C}_{16}\text{H}_{26}\text{O}_4$ : C, 68.06; H, 9.28. Found: C, 68.26; H, 9.27.

**Ditert-butyl (2*E*,4*Z*)-4,5-dipropyl-2,4-octadienedioate (3ca).**

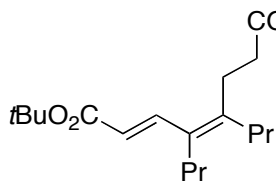

Yield: 49% (Method A), colorless oil.  $^1\text{H}$  NMR (500 MHz,  $\text{CDCl}_3$ ):  $\delta$  7.63 (d,  $J = 15.5$  Hz, 1H), 5.76 (d,  $J = 15.5$  Hz, 1H), 2.56 (t,  $J = 8.0$  Hz, 2H), 2.30 (t,  $J = 8.0$  Hz, 2H), 2.19 (t,  $J = 8.0$  Hz, 2H), 2.13 (t,  $J = 8.0$  Hz, 2H), 1.50 (s, 9H), 1.43 (s, 9H), 1.50-1.38 (m, 4H), 0.93 (t,  $J = 7.0$  Hz, 3H), 0.92 (t,  $J = 7.0$  Hz, 3H).  $^{13}\text{C}$  NMR (125 MHz,  $\text{CDCl}_3$ ):  $\delta$  172.08, 167.34, 147.22, 141.23, 132.05, 118.33, 80.42, 79.93, 35.48, 35.44, 30.24, 28.22, 28.07, 27.26, 22.48, 21.96, 14.37, 14.31. IR (neat): 2965, 1730, 1709, 1614, 1456, 1368, 1308, 1258, 1150, 982, 849, 754  $\text{cm}^{-1}$ . MS (FAB):  $m/z$  (%): 367 ( $[\text{M}+\text{H}]^+$ , 15), 311 ( $[\text{M}+\text{H}-\text{H}_2\text{C}=\text{C}(\text{CH}_3)_2]^+$ , 10), 255 ( $[\text{M}+\text{H}-\text{H}_2\text{C}=\text{C}(\text{CH}_3)_2]^+$ , 100), 237 (50), 219(50). HRMS calcd for  $\text{C}_{22}\text{H}_{38}\text{O}_4$ : 366.2770. Found: 366.2764.

**Diethyl (2*E*,4*Z*)-4,5-bis(4-methoxyphenyl)-2,4-octadienedioate (3ab).**

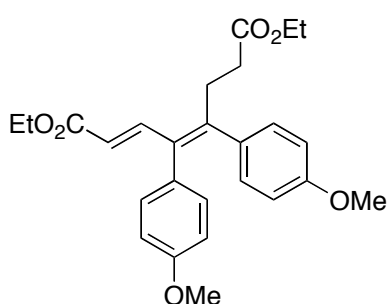

Yield: 82% (Method B), colorless oil. <sup>1</sup>H NMR (500 MHz, CDCl<sub>3</sub>): δ 8.09 (d, *J* = 15.5 Hz, 1H), 6.87 (d, *J* = 9.0 Hz, 2H), 6.82 (d, *J* = 9.0 Hz, 2H), 6.68 (d, *J* = 9.0 Hz, 2H), 6.62 (d, *J* = 9.0 Hz, 2H), 5.55 (d, *J* = 15.5 Hz, 1H), 4.19 (q, *J* = 7.0 Hz, 2H), 4.09 (q, *J* = 7.0 Hz, 2H), 3.73 (s, 3H), 3.71 (s, 3H), 3.11 (t, *J* = 8.0 Hz, 2H), 2.37 (t, *J* = 8.0 Hz, 2H), 1.27 (t, *J* = 7.0 Hz, 3H), 1.24 (t, *J* = 7.0 Hz, 3H). <sup>13</sup>C NMR (125 MHz, CDCl<sub>3</sub>): δ 172.52, 167.60, 158.26, 158.07, 146.94, 143.21, 135.90, 133.31, 131.81, 131.23, 130.37, 121.88, 113.38, 113.16, 60.50, 60.24, 55.06, 33.34, 29.55, 14.29, 14.18. IR (neat): 2980, 1732, 1712, 1607, 1508, 1292, 1248, 1175, 1034, 978, 868, 835, 600 cm<sup>-1</sup>. MS (EI): *m/z* (%): 438 ([M]<sup>+</sup>, 100), 346 (90), 277 (80). HRMS calcd for C<sub>26</sub>H<sub>30</sub>O<sub>6</sub>: 438.2042. Found: 438.2032. Anal Calcd for C<sub>26</sub>H<sub>30</sub>O<sub>6</sub>: C, 71.21; H, 6.90. Found: C, 71.10; H, 6.99.

**Diethyl (2*E*,4*Z*)-4,5-diphenyl-2,4-octadienedioate (3ac).**

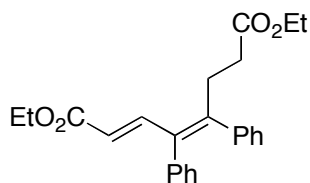

Yield: 68% (Method B), Yield: 49% (Method A), colorless oil. <sup>1</sup>H NMR (500 MHz, CDCl<sub>3</sub>): δ 8.12 (d, *J* = 15.5 Hz, 1H), 7.13-7.30 (m, 6H), 6.94-6.89 (m, 4H), 5.53 (d, *J* = 15.5 Hz, 1H), 4.19 (q, *J* = 7.0 Hz, 2H), 4.10 (q, *J* = 7.0 Hz, 2H), 3.15 (t, *J* = 8.0 Hz, 2H), 2.39 (t, *J* = 8.0 Hz, 2H), 1.27 (t, *J* = 7.0 Hz, 3H), 1.24 (t, *J* = 7.0 Hz, 3H). <sup>13</sup>C NMR (125 MHz, CDCl<sub>3</sub>): δ 172.43, 167.47, 147.48, 142.51, 140.95, 138.62, 136.82, 130.63, 129.00, 127.80, 127.67, 126.83, 126.60, 122.47, 60.55, 60.33, 33.16, 29.49, 14.27, 14.17. IR (neat): 2982, 1732, 1713, 1614, 1443, 1368, 1292, 1175, 1034, 978, 868, 770, 700, 598 cm<sup>-1</sup>. MS (EI): *m/z* (%): 378 ([M]<sup>+</sup>, 18), 332 ([M-OEt-H]<sup>+</sup>, 89), 304 ([M-CO<sub>2</sub>Et-H], 86), 286 (100), 258 (85), 217 (93). HRMS calcd for C<sub>24</sub>H<sub>26</sub>O<sub>4</sub>: 378.1831. Found: 378.1828.

**Diethyl (2*E*,4*Z*)-4,5-bis(4-fluorophenyl)-2,4-octadienedioate (3ad).**

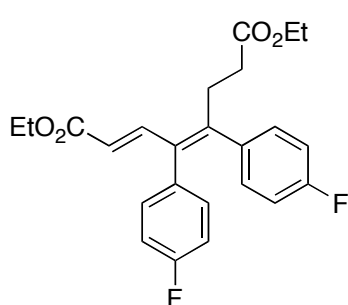

Yield: 30% (Method B), colorless oil. <sup>1</sup>H NMR (500 MHz, CDCl<sub>3</sub>): δ 8.07 (d, *J* = 15.5 Hz, 1H), 6.91-6.78 (m, 8H), 5.50 (d, *J* = 15.5 Hz, 1H), 4.20 (q, *J* = 7.0 Hz, 2H), 4.09 (q, *J* = 7.0 Hz, 2H), 3.12 (t, *J* = 8.0 Hz, 2H), 2.37 (t, *J* = 8.0 Hz, 2H), 1.27 (t, *J* = 7.0 Hz, 3H), 1.24 (t, *J* = 7.0 Hz, 3H). <sup>13</sup>C NMR (125 MHz, CDCl<sub>3</sub>): δ 172.21, 167.22,

161.54 (d, *J*<sub>CF</sub> = 245 Hz), 146.77, 142.20, 136.65, 136.25, 134.38, 132.17 (d, *J*<sub>CF</sub> = 8.1 Hz), 130.67 (d, *J*<sub>CF</sub> = 8.0 Hz), 122.83, 115.03 (d, *J*<sub>CF</sub> = 21.0 Hz), 114.90 (d, *J*<sub>CF</sub> = 21.0 Hz), 60.63, 60.44, 33.03, 29.55, 14.26, 14.16. IR (neat): 2983, 1733, 1713, 1615, 1602, 1506, 1292, 1223, 1178, 1159, 1046, 978, 838, 736 cm<sup>-1</sup>. MS (EI): *m/z* (%): 414 ([M]<sup>+</sup>, 8) 368 ([M-OEt-H]<sup>+</sup>, 32), 340 ([M-CO<sub>2</sub>Et-H]<sup>+</sup>, 45), 322 ([M-2OEt-2H]<sup>+</sup>, 100), 294 ([M-CO<sub>2</sub>Et-OEt-2H]<sup>+</sup>, 75). HRMS calcd for C<sub>24</sub>H<sub>24</sub>F<sub>2</sub>O<sub>4</sub>: 414.1643. Found: 414.1650.

**Diethyl (2*E*,4*E*)-4-methyl-5-phenyl-2,4-octadienedioate and Diethyl (2*E*,4*E*)-5-methyl-4-phenyl-2,4-octadienedioate (1.4:1 mixture) (3ae).**

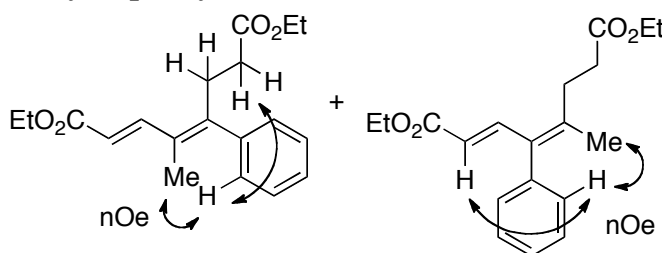

Yield: 53% (Method B), colorless oil. <sup>1</sup>H NMR (500 MHz, CDCl<sub>3</sub>): δ 7.97 (d, *J* = 16.0 Hz, 0.58H), 7.96 (d, *J* = 15.5 Hz, 0.42H), 7.36 (m, 2H), 7.30 (m, 1H), 7.10 (dd, *J*

= 7.5, 1.5 Hz, 1.17H), 7.01 (dd, *J* = 8.0, 1.5 Hz, 0.83H), 5.99 (d, *J* = 16.0 Hz, 0.58H), 5.23 (d, *J* = 15.5 Hz, 0.42H), 4.25 (q, *J* = 7.0 Hz, 1.17H), 4.16 (q, *J* = 7.0 Hz, 0.83H), 4.15 (q, *J* = 7.0 Hz, 0.83H), 4.05 (q, *J* = 7.0 Hz, 1.17H), 2.97 (t, *J* = 8.0 Hz, 1.17H), 2.80 (t, *J* = 8.0 Hz, 0.83H), 2.54 (t, *J* = 8.0 Hz, 0.83H), 2.28 (t, *J* = 8.0 Hz, 1.17H), 1.68 (s, 1.75H), 1.63 (s, 1.25H), 1.34-1.19 (m, 6H). <sup>13</sup>C NMR (125 MHz, CDCl<sub>3</sub>): δ 172.52, 172.44, 167.61, 167.54, 146.95, 144.10, 142.29, 142.13, 141.74, 139.16, 135.85, 129.49, 128.89, 128.50, 128.32, 128.28, 127.24, 126.99, 120.39, 119.05, 60.63, 60.43, 60.31, 60.14, 33.49, 33.21, 29.54, 29.24, 21.36, 16.31, 14.34, 14.27, 14.20, 14.12. IR (neat): 2981, 1732, 1712, 1617, 1443, 1368, 1293, 1177, 1036, 976, 861, 772, 704 cm<sup>-1</sup>. MS (EI): *m/z* (%): 316 ([M]<sup>+</sup>, 11), 270 ([M-OEt-H]<sup>+</sup>, 45), 242 ([M-CO<sub>2</sub>Et-H], 70), 196 ([M-CO<sub>2</sub>Et-OEt-2H]<sup>+</sup>, 65), 169 ([M-2CO<sub>2</sub>Et-H], 80), 155 ([M-2CO<sub>2</sub>Et-Me]<sup>+</sup>, 100). HRMS calcd for C<sub>19</sub>H<sub>24</sub>O<sub>4</sub>: 316.1675. Found: 316.1683.

**Diethyl (2E,4Z)-5-methyl-4-n-pentyl-2,4-octadienedioate and Diethyl (2E,4Z)-4-methyl-5-n-pentyl-2,4-octadienedioate (1:1 mixture) (3af).**

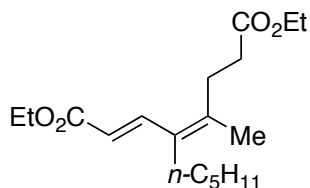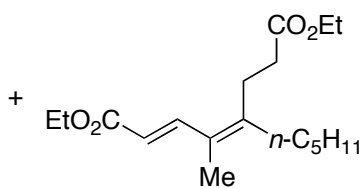

Yield: 50% (Method A), colorless oil. <sup>1</sup>H NMR (500 MHz, CDCl<sub>3</sub>): δ 7.79 (d, *J* = 15.5 Hz, 0.5H), 7.75 (d, *J* = 15.5

Hz, 0.5H), 5.84 (d, *J* = 15.5 Hz, 1H), 4.21 (q, *J* = 7.0 Hz, 2H), 4.12 (q, *J* = 7.0 Hz, 1H), 4.11 (q, *J* = 7.0 Hz, 1H), 2.64 (m, 2H), 2.40 (m, 2H), 2.22 (t, *J* = 7.5 Hz, 1H), 2.17 (t, *J* = 8.0 Hz, 1H), 1.87 (s, 1.5H), 1.79 (s, 1.5H), 1.31 (m, 6H), 1.25 (m, 6H), 0.89 (t, *J* = 6.5 Hz, 3H). <sup>13</sup>C NMR (125 MHz, CDCl<sub>3</sub>): δ 172.69, 172.62, 167.93, 167.77, 147.68, 142.80, 141.68, 132.54, 127.26, 116.95, 116.35, 60.51, 60.13, 34.13, 33.95, 33.64, 32.07, 32.05, 29.73, 28.56, 28.32, 28.14, 27.81, 22.54, 22.52, 19.87, 14.34, 14.17, 14.08, 14.03, 13.97. IR (neat): 2959, 2872, 1738, 1713, 1614, 1466, 1368, 1301, 1267, 1177, 1037, 978, 856, 731 cm<sup>-1</sup>. HRMS calcd for C<sub>18</sub>H<sub>32</sub>O<sub>4</sub>: 310.2144. Found: 310.2148. Anal calcd for C<sub>18</sub>H<sub>32</sub>O<sub>4</sub>: C, 69.64; H, 9.74. Found: C, 69.77; H, 9.53.

**Diethyl (2E,4Z)-4-isopropyl-5-methyl-2,4-octadienedioate and Diethyl (2E,4E)-5-isopropyl-4-methyl-2,4-octadienedioate (1:1 mixture) (3ag).**

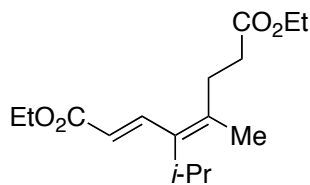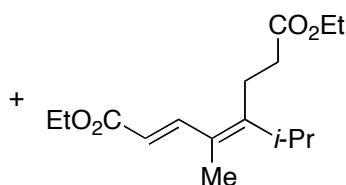

Yield: 60% (Method A), colorless oil. <sup>1</sup>H NMR (500 MHz, CDCl<sub>3</sub>): δ 7.75 (d, *J* = 16.0 Hz, 0.5H), 7.75 (d, *J* = 16.0 Hz, 0.5H), 5.86

(d, *J* = 16.0 Hz, 0.5H), 5.85 (d, *J* = 16.0 Hz, 0.5H), 4.21 (q, 7.0 Hz, 2H), 4.14 (q, *J* = 7.0 Hz, 1H), 4.11 (q, *J* = 7.0 Hz, 1H), 3.03 (sept, *J* = 7.0 Hz, 0.5H), 2.92 (sept, *J* = 7.0 Hz, 0.5H), 2.59 (t, *J* = 8.0 Hz, 1H), 2.51 (t, *J* = 8.0 Hz, 1H), 2.37 (m, 2H). 1.29 (m, 6H), 1.04 (t, *J* = 7.0 Hz, 6H). <sup>13</sup>C NMR (125 MHz, CDCl<sub>3</sub>): δ 172.86, 172.60, 167.66, 167.16, 151.90, 143.48, 142.56, 137.57, 135.97, 126.30, 120.42, 117.29, 60.48, 60.41, 60.21, 60.13, 35.85, 33.50, 31.71, 30.95, 29.48, 22.65, 20.91, 20.66, 18.65, 14.31, 14.19, 14.17, 13.63. IR (neat): 2976, 1738, 1712, 1614, 1460, 1368, 1290, 1177, 1038, 982, 858 cm<sup>-1</sup>. MS (EI): *m/z* (%): 282 ([M]<sup>+</sup>, 23), 239 ([M-CH(CH<sub>3</sub>)<sub>2</sub>]<sup>+</sup>, 100), 208 ([M-CO<sub>2</sub>Et-H]<sup>+</sup>, 88), 121 (79). HRMS calcd for C<sub>16</sub>H<sub>26</sub>O<sub>4</sub>: 282.1831. Found: 282.1837. Anal calcd for C<sub>16</sub>H<sub>26</sub>O<sub>4</sub>: C, 68.06; H, 9.28. Found: C, 68.29; H, 9.34.

**Diethyl (2E,4E)-4-tert-butyl-5-methyl-2,4-octadienedioate and Diethyl (2E,4E)-5-tert-butyl-4-methyl-2,4-octadienedioate (3:1 mixture) (3ah).**

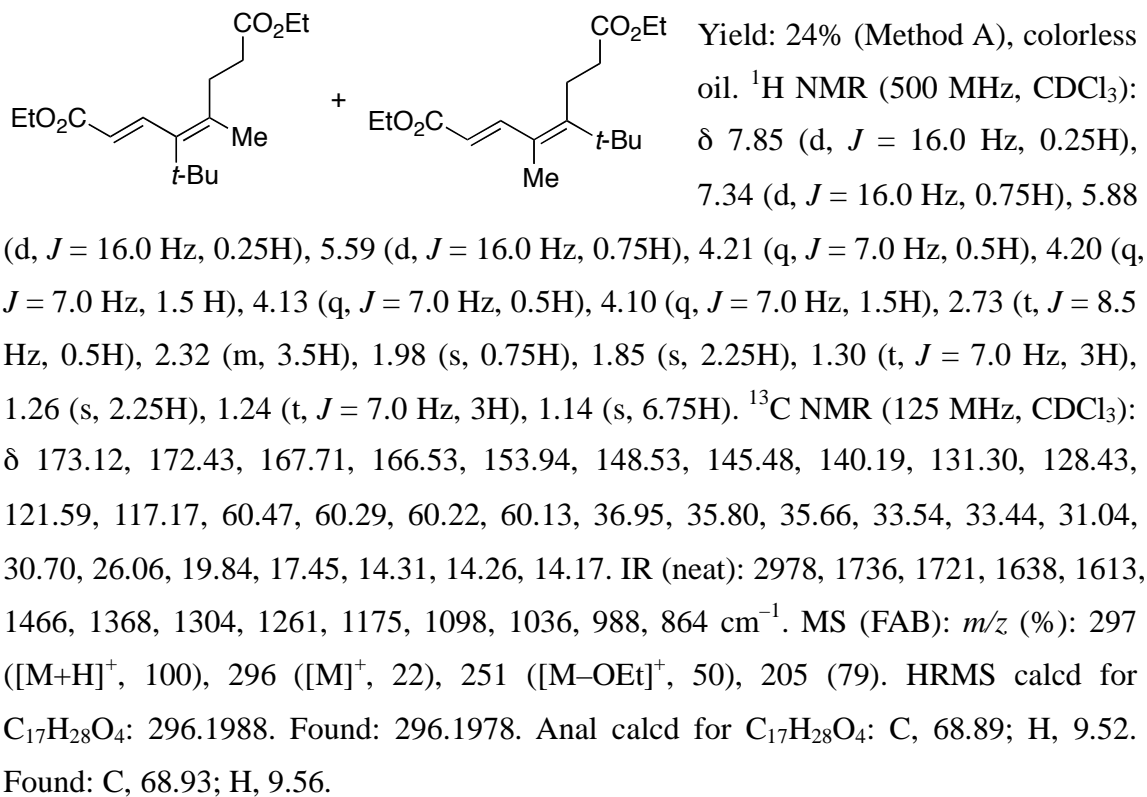

**Procedure for the nickel-catalyzed synthesis of conjugated diene with IMes as a sterically less hindered ligand.**

The reaction was performed in a 5 mL sealed vessel equipped with a Teflon-coated magnetic stirrer tip. Acrylate **1a** (2.0 mmol, 2.0 equiv.) and alkyne **2a** (0.50 mmol) were added to a solution of bis(1,5-dicyclooctadiene)nickel (6.8 mg, 0.025 mmol), 1,3-bis(2,4,6-trimethylphenyl)imidazolium chloride (17 mg, 0.050 mmol) and potassium *tert*-butoxide (6.2 mg, 0.055 mmol) in 1,4-dioxane (2 mL) in a dry box. The VIAL was taken outside the dry box and heated at 100 °C for 24 h. The resulting reaction mixture was cooled to ambient temperature and filtered through a silica gel pad, concentrated *in vacuo*. The residue was purified by flash silica gel column chromatography (eluted by hexane/ethyl acetate = 10:1) to give the corresponding conjugated diene **3aa** in 51% yield along with triene **4aa** in 21% yield.



### General procedure for the nickel-catalyzed synthesis of conjugated triene.

The reaction was performed in a 5 mL sealed vessel equipped with a Teflon-coated magnetic stirrer tip. An acrylate (0.75 mmol, 1.5 equiv.) and an alkyne (1.0 mmol) were added to a solution of bis(1,5-dicyclooctadiene)nickel (14 mg, 0.050 mmol), tris(4-methoxyphenyl)phosphine (35 mg, 0.10 mmol) in MeCN (2 mL) in a dry box. The VIAL was taken outside the dry box and heated at 80 °C for 24 h. The resulting reaction mixture was cooled to ambient temperature and filtered through a silica gel pad, concentrated *in vacuo*. The residue was purified by flash silica gel column chromatography (eluted by hexane/ethyl acetate = 40:1) to give the corresponding conjugated triene.

### Ethyl (2*E*,4*Z*,6*E*)-4,5,6-tripropyl-2,4,6-decatrienoate (4aa).

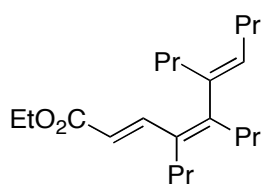

Yield: 92%, colorless oil. <sup>1</sup>H NMR (500 MHz, CDCl<sub>3</sub>): δ 7.78 (d, *J* = 16 Hz, 1H), 5.76 (d, *J* = 16 Hz, 1H), 5.00 (t, *J* = 7 Hz, 1H), 4.17 (q, *J* = 7.5 Hz, 2H), 2.25 (m, 2H), 2.20 (t, *J* = 8 Hz, 2H), 2.12 (m, 4H), 1.48-1.26 (m, 8H), 1.28 (t, *J* = 7.5 Hz, 3H), 0.96-0.88 (m, 12H). <sup>13</sup>C NMR (125 MHz, CDCl<sub>3</sub>): δ 168.15, 154.13, 146.16, 138.65, 132.58, 132.26, 114.71, 59.87, 33.13, 31.58, 30.09, 30.01, 22.99, 22.37, 21.83, 21.30, 14.41, 14.33, 14.17, 13.95. IR (neat): 2959, 2872, 1711, 1613, 1458, 1266, 1165, 1045, 991, 899, 853, 746 cm<sup>-1</sup>. MS (EI): *m/z* (%): 320 ([M]<sup>+</sup>, 100), 291 ([M-Et]<sup>+</sup>, 86), 277 ([M-Pr]<sup>+</sup>, 87), 247 ([M-CO<sub>2</sub>Et]<sup>+</sup>, 90). HRMS calcd for C<sub>21</sub>H<sub>36</sub>O<sub>2</sub>: 320.2715. Found: 320.2708.

### Methyl (2*E*,4*Z*,6*E*)-4,5,6-tripropyl-2,4,6-decatrienoate (4ba).

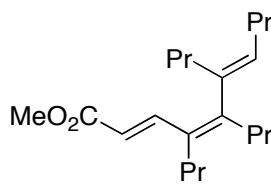

Yield: 94%, colorless oil. <sup>1</sup>H NMR (500 MHz, CDCl<sub>3</sub>): δ 7.79 (d, *J* = 16 Hz, 1H), 5.77 (d, *J* = 16 Hz, 1H), 5.04 (t, *J* = 7.5 Hz, 1H), 3.71 (s, 3H), 2.25 (m, 2H), 2.20 (t, *J* = 7.5 Hz, 2H), 2.11 (m, 4H), 0.96-0.87 (m, 12H). <sup>13</sup>C NMR (125 MHz, CDCl<sub>3</sub>): δ 168.56, 154.34, 146.44, 138.72, 132.55, 132.31, 114.29, 51.19, 33.18, 31.65, 30.08, 30.02, 22.94, 22.36, 21.83, 21.33, 14.42, 14.30, 14.16, 13.86. IR (neat): 2957, 2872, 1722, 1614, 1456, 1433, 1267, 1165, 1045, 991, 898, 858, 748 cm<sup>-1</sup>. MS (EI): *m/z* (%): 306 ([M]<sup>+</sup>, 86), 263 ([M-Pr]<sup>+</sup>, 100), 247 ([M-CO<sub>2</sub>Me]<sup>+</sup>, 65). HRMS calcd for C<sub>20</sub>H<sub>34</sub>O<sub>2</sub>: 306.2559. Found: 306.2558.

***tert*-Butyl (2*E*,4*Z*,6*E*)-4,5,6-tripropyl-2,4,6-decatrienoate (4ca).**

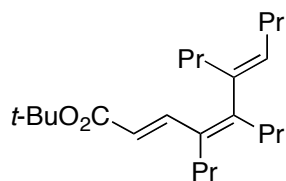

Yield: 75%, colorless oil.  $^1\text{H}$  NMR (500 MHz,  $\text{CDCl}_3$ ):  $\delta$  7.65 (d,  $J = 16$  Hz, 1H), 5.67 (d,  $J = 16$  Hz, 1H), 5.04 (t,  $J = 7.5$  Hz, 1H), 2.23 (m, 2H), 2.18 (t,  $J = 7$  Hz, 2H), 2.11 (m, 4H), 1.47 (s, 9H), 1.45-1.24 (m, 8H), 0.95-0.87 (m, 12H).  $^{13}\text{C}$  NMR (125 MHz,  $\text{CDCl}_3$ ):  $\delta$  167.48, 153.24, 145.06, 138.72, 132.60, 132.08, 116.77, 79.44, 33.14, 31.61, 30.05, 28.23, 23.05, 22.39, 21.83, 21.29, 14.45, 14.35, 14.16, 13.98. IR (neat): 2956, 2872, 1703, 1613, 1456, 1366, 1287, 1150, 988, 897, 856, 746  $\text{cm}^{-1}$ . MS (EI):  $m/z$  (%): 348 ( $[\text{M}]^+$ , 14), 292 ( $[\text{M}-(\text{CH}_3)_2\text{C}=\text{CH}_2]^+$ , 100), 247 ( $[\text{M}-\text{CO}_2t\text{-Bu}]^+$ , 72). HRMS calcd for  $\text{C}_{23}\text{H}_{40}\text{O}_2$ : 348.3028.

**(2*E*,4*Z*,6*E*)-*N,N*-Dimethyl-4,5,6-tripropyl-2,4,6-decatrienamamide (4da).**

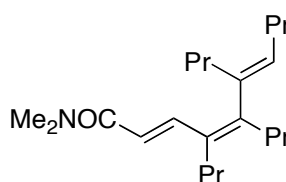

Yield: 71%, colorless oil.  $^1\text{H}$  NMR (500 MHz,  $\text{CDCl}_3$ ):  $\delta$  7.70 (d,  $J = 15$  Hz, 1H), 6.17 (d,  $J = 15$  Hz, 1H), 5.04 (t,  $J = 7.5$  Hz, 1H), 3.08 (s, 3H), 3.00 (s, 3H), 2.27 (m, 2H), 2.18 (t,  $J = 8$  Hz, 2H), 2.10 (m, 4H), 1.46-1.28 (m, 8H), 0.96-0.87 (m, 12H).  $^{13}\text{C}$  NMR (125 MHz,  $\text{CDCl}_3$ ):  $\delta$  168.01, 152.33, 143.52, 138.64, 132.40, 131.76, 113.97, 37.34, 35.72, 33.24, 31.83, 30.20, 30.08, 22.99, 22.40, 21.80, 21.35, 14.52, 14.40, 14.18, 13.96. IR (neat): 2957, 2872, 1643, 1595, 1458, 1389, 1265, 1130, 990, 899, 844, 735  $\text{cm}^{-1}$ . MS (EI):  $m/z$  (%): 319 ( $[\text{M}]^+$ , 80), 290 ( $[\text{M}-\text{Et}]^+$ , 46), 247 ( $[\text{M}-\text{CONMe}_2]^+$ , 74), 205 ( $[\text{M}-\text{Pr}-\text{CONMe}_2]^+$ , 100). HRMS calcd for  $\text{C}_{21}\text{H}_{37}\text{NO}$ : 319.2875. Found: 319.2873.

**Diethyl (1*E*,3*Z*,5*E*)-3,4,5-tripropyl-1,3,5-nonatrienylphosphonate (4ea).**

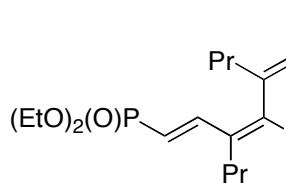

Yield: 83%, colorless oil.  $^1\text{H}$  NMR (500 MHz,  $\text{CDCl}_3$ ):  $\delta$  7.46 (dd,  $J = 23.5, 17.5$  Hz, 1H), 5.54 (dd,  $J = 20.5, 17.5$  Hz, 1H), 5.03 (t,  $J = 7$  Hz, 1H), 4.04 (m, 2H), 2.23 (m, 2H), 2.18 (t,  $J = 7.5$  Hz, 2H), 2.09 (m, 4H), 1.43-1.24 (m, 8H), 1.30 (t,  $J = 7$  Hz, 6H), 0.94-0.87 (m, 12H).  $^{13}\text{C}$  NMR (125 MHz,  $\text{CDCl}_3$ ):  $\delta$  153.01, 149.19 (d,  $J = 7.6$  Hz), 138.62, 132.79 (d,  $J = 22.5$  Hz), 132.04, 109.44 (d,  $J = 193$  Hz), 61.39 (d,  $J = 5.3$  Hz), 33.18, 31.65, 30.06, 29.66, 22.93, 22.28, 21.76, 21.33, 16.36 (d,  $J = 6.3$  Hz), 14.46, 14.33, 14.15, 13.96. IR (neat): 2959, 2872, 1599, 1462, 1252, 1057, 1030, 961, 853, 818, 789, 735  $\text{cm}^{-1}$ . MS (EI):  $m/z$  (%): 384 ( $[\text{M}]^+$ , 39), 355 ( $[\text{M}-\text{Et}]^+$ , 40), 341 ( $[\text{M}-\text{Pr}]^+$ , 58), 246 ( $[\text{M}-\text{P}(\text{OH})(\text{OEt})_2]^+$ , 99), 217 ( $[\text{M}-\text{P}(\text{OH})(\text{OEt})_2-\text{Et}]^+$ , 100), 203

([M–P(OH)(OEt)<sub>2</sub>–Pr]<sup>+</sup>, 85). HRMS calcd for C<sub>22</sub>H<sub>41</sub>O<sub>3</sub>P: 384.2793. Found: 384.2795.  
Anal calcd for C<sub>22</sub>H<sub>41</sub>O<sub>3</sub>P: C, 68.72; H, 10.75. Found: C, 68.60; H, 10.79.

**(2E,4Z,6E)-4,5,6-tripropyl-2,4,6-decatrienenitrile (4fa).**

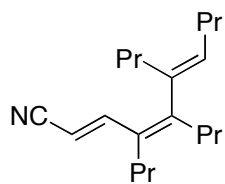

Yield: 22%, colorless oil. <sup>1</sup>H NMR (500 MHz, CDCl<sub>3</sub>): δ 7.46 (d, *J* = 16.5 Hz, 1H), 5.19 (d, *J* = 16.5 Hz, 1H), 5.02 (t, *J* = 7.5 Hz, 1H), 2.19 (m, 4H), 2.11 (m, 4H), 1.46-1.31 (m, 6H), 1.40 (sext, *J* = 8 Hz, 2H), 0.94 (t, *J* = 7.5 Hz, 6H), 0.90 (t, *J* = 7.5 Hz, 3H), 0.89 (t, *J* = 7.5 Hz, 3H). <sup>13</sup>C NMR (125 MHz, CDCl<sub>3</sub>): δ 155.42, 151.60, 138.58, 132.96, 132.24, 119.93, 92.10, 33.12, 31.56, 30.00, 29.26, 22.86, 22.12, 21.77, 21.37, 14.44, 14.23, 14.12, 13.88. IR (neat): 2961, 2872, 2212, 1593, 1460, 1377, 1300, 972, 899, 812, 746 cm<sup>-1</sup>. MS (EI): *m/z* (%): 273 ([M]<sup>+</sup>, 25), 244 ([M–Et]<sup>+</sup>, 24), 230 ([M–Pr]<sup>+</sup>, 100). HRMS calcd for C<sub>19</sub>H<sub>31</sub>N: 273.2457. Found: 273.2446. Anal calcd for C<sub>19</sub>H<sub>31</sub>N: C, 83.45; H, 11.43; N, 5.12. Found: C, 83.16; H, 11.33; N, 4.98.

**Ethyl (2E,4Z,6E)-4,5,6,7-tetraphenyl-2,4,6-heptatrienoate (4ac).**

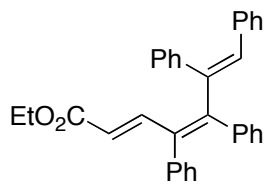

Yield: 77%, pale yellow powder. <sup>1</sup>H NMR (500 MHz, CDCl<sub>3</sub>): δ 8.38 (d, *J* = 15.5 Hz, 1H), 7.19 (m, 8H), 7.13 (m, 7H), 7.00-6.94 (m, 5H), 6.89 (s, 1H), 6.82 (m, 1H), 5.69 (d, *J* = 15.5 Hz, 1H), 4.12 (q, *J* = 7 Hz, 2H), 1.18 (t, *J* = 7 Hz, 3H). <sup>13</sup>C NMR (125 MHz, CDCl<sub>3</sub>): δ 167.45, 151.69, 146.21, 141.32, 138.90, 138.75, 138.33, 136.44, 134.52, 131.10, 130.47, 129.68, 129.56, 128.19, 128.06, 128.03, 127.35, 127.32, 127.03, 127.00, 121.75, 60.11, 14.12. The configuration of triene **4ac** was unambiguously confirmed by an X-ray crystal structure analysis.

**Ethyl (2E,4E,6E)-4,6-dimethyl-5,7-diphenyl-2,4,6-heptatrienoate (4ae).**

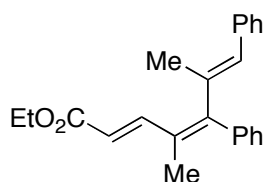

Yield: 86% (9/1), colorless oil. <sup>1</sup>H NMR (500 MHz, CDCl<sub>3</sub>): δ 8.03 (d, *J* = 15.5 Hz, 1H), 7.37 (m, 6H), 7.27 (m, 4H), 6.49 (s, 1H), 6.00 (d, *J* = 15.5 Hz, 1H), 4.21 (q, *J* = 7.5 Hz, 2H), 1.88 (s, 3H), 1.78 (s, 3H), 1.29 (t, *J* = 7.5 Hz, 3H). <sup>13</sup>C NMR (125 MHz, CDCl<sub>3</sub>): δ 167.71, 153.74, 145.80, 139.67, 137.79, 137.38, 132.65, 129.38, 129.11, 128.87, 128.19, 128.14, 127.65, 126.81, 117.71, 60.14, 18.16, 16.32, 14.30.

**Ethyl (2E,4E,6E)-6-benzylidene-5-phenyl-4-propyl-2,4-nonadienoate (4ai).**

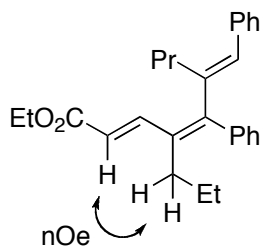

Yield: 81% (9/1), colorless oil.  $^1\text{H}$  NMR (500 MHz,  $\text{CDCl}_3$ ):  $\delta$  8.00 (d,  $J = 16$  Hz, 1H), 7.38-7.31 (m, 8H), 7.26 (m, 2H), 6.47 (s, 1H), 5.98 (d,  $J = 16$  Hz, 1H), 4.20 (q,  $J = 7$  Hz, 2H), 2.24 (m, 2H), 2.05 (t,  $J = 7.5$  Hz, 2H), 1.49 (sext,  $J = 7.5$  Hz, 2H), 1.40 (sext,  $J = 7.5$  Hz, 2H), 1.29 (t,  $J = 7$  Hz, 3H), 0.83 (t,  $J = 7.5$  Hz, 3H), 0.81 (t,  $J = 7.5$  Hz, 3H).  $^{13}\text{C}$  NMR (125 MHz,  $\text{CDCl}_3$ ):  $\delta$  167.77, 152.71, 145.18, 143.01, 139.92, 137.41, 135.40, 132.55, 128.89, 128.79, 128.21, 128.12, 127.51, 126.80, 117.29, 60.12, 32.10, 31.79, 22.81, 21.35, 14.28, 14.25, 14.29. IR (neat): 2959, 2872, 1713, 1614, 1491, 1454, 1292, 1258, 1175, 1038, 860, 748, 700  $\text{cm}^{-1}$ . MS (EI):  $m/z$  (%): 388 ( $[\text{M}]^+$ , 100), 359 ( $[\text{M}-\text{Et}]^+$ , 42), 345 ( $[\text{M}-\text{Pr}]^+$ , 25), 315 ( $[\text{M}-\text{CO}_2\text{Et}]^+$ , 73). HRMS calcd for  $\text{C}_{27}\text{H}_{32}\text{O}_2$ : 388.2402. Found: 388.2391.

**Ethyl (2E,4Z,6E)-4,6-dicyclopropyl-5,7-diphenyl-2,4,6-heptatrienoate (4aj).**

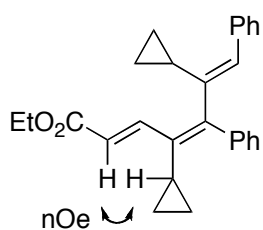

Yield: 60% (7/3), colorless oil.  $^1\text{H}$  NMR (500 MHz,  $\text{CDCl}_3$ ):  $\delta$  8.03 (d,  $J = 15.5$  Hz, 0.3H), 7.82 (d,  $J = 15.5$  Hz, 0.7H), 7.60 (d,  $J = 7.5$  Hz, 1.4H), 7.45-7.08 (m, 8.6H), 6.48 (d,  $J = 15.5$  Hz, 0.3H), 6.44 (d,  $J = 15.5$  Hz, 0.7H), 6.37 (s, 0.7H), 4.99 (d,  $J = 10$  Hz, 0.3H), 4.25 (q,  $J = 7$  Hz, 0.6H), 4.22 (q,  $J = 7$  Hz, 1.4H), 1.82 (m, 1H), 1.58 (m, 1H), 1.33 (t,  $J = 7$  Hz, 0.9H), 1.30 (t,  $J = 7$  Hz, 2.1H), 0.84 (m, 0.6H), 0.70 (m, 1.4H), 0.65 (m, 0.6H), 0.59 (m, 2H), 0.36 (m, 1.4H), 0.02 (m, 2H).  $^{13}\text{C}$  NMR (125 MHz,  $\text{CDCl}_3$ ):  $\delta$  167.90, 167.75, 153.34, 151.81, 146.99, 146.65, 142.19, 141.39, 139.74, 139.71, 139.09, 137.20, 135.98, 135.86, 133.13, 130.25, 129.91, 129.44, 129.33, 128.15, 128.09, 127.79, 127.71, 127.58, 127.26, 127.21, 126.77, 126.53, 118.26, 118.09, 60.09, 59.97, 14.36, 14.27, 14.06, 12.47, 11.93, 11.83, 9.45, 9.22, 8.11, 7.33. IR (neat): 3080, 3001, 1713, 1614, 1443, 1366, 1287, 1159, 1030, 986, 941, 864, 758, 700  $\text{cm}^{-1}$ . MS (EI):  $m/z$  (%): 384 ( $[\text{M}]^+$ , 88), 355 ( $[\text{M}-\text{Et}]^+$ , 18), 311 ( $[\text{M}-\text{CO}_2\text{Et}]^+$ , 100), 269 ( $[\text{M}-\text{CO}_2\text{Et}-\text{C}_3\text{H}_6]^+$ , 63). HRMS calcd for  $\text{C}_{27}\text{H}_{28}\text{O}_2$ : 384.2089. Found: 384.2076.



## NMR Spectra of Products

### 3aa

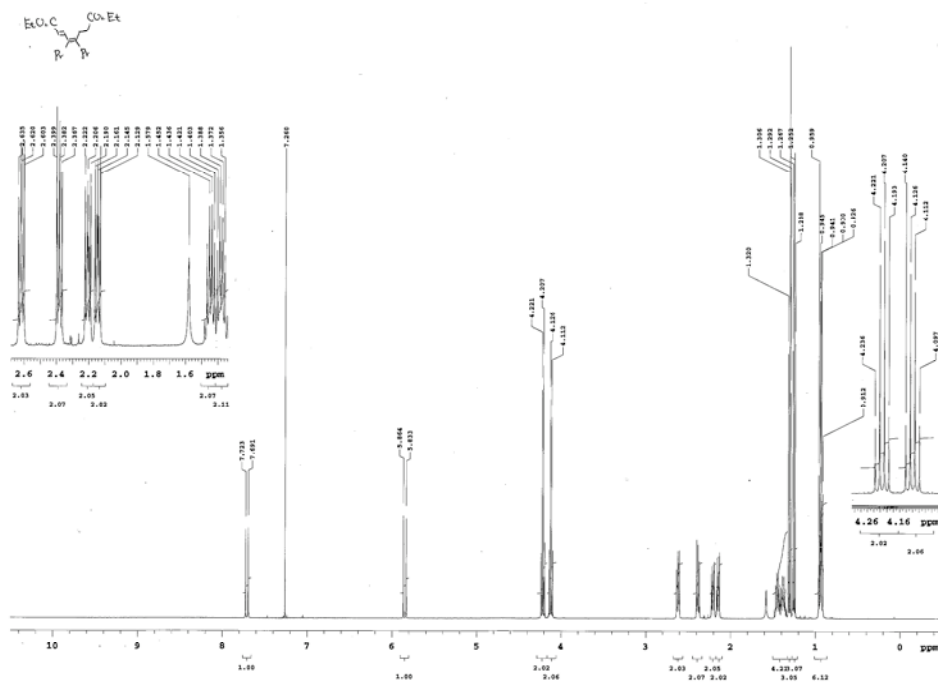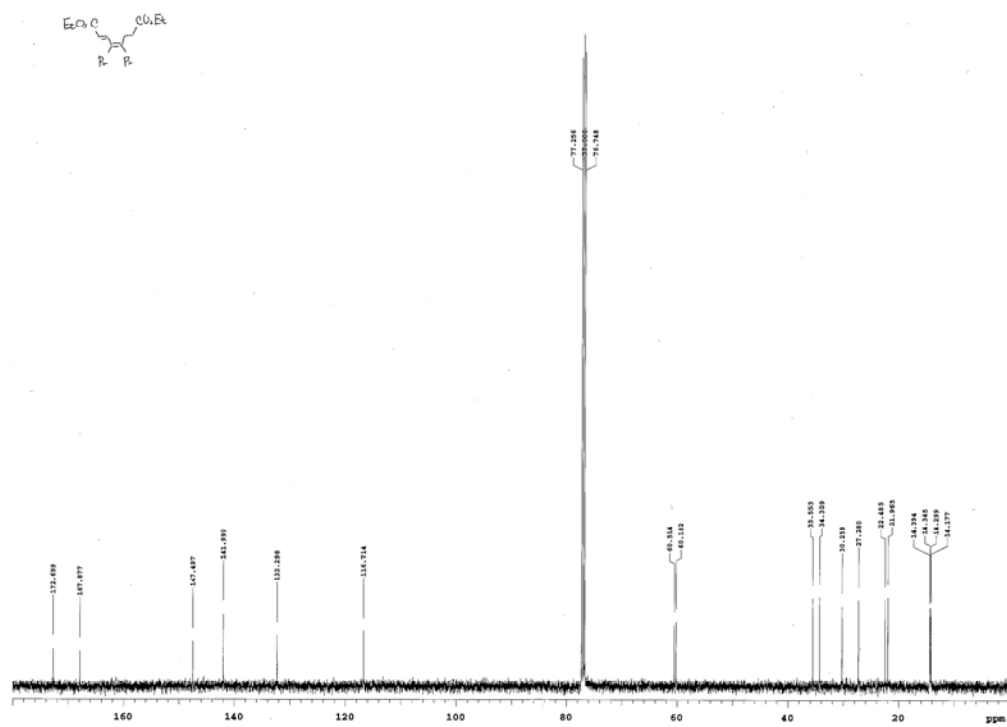

3ba

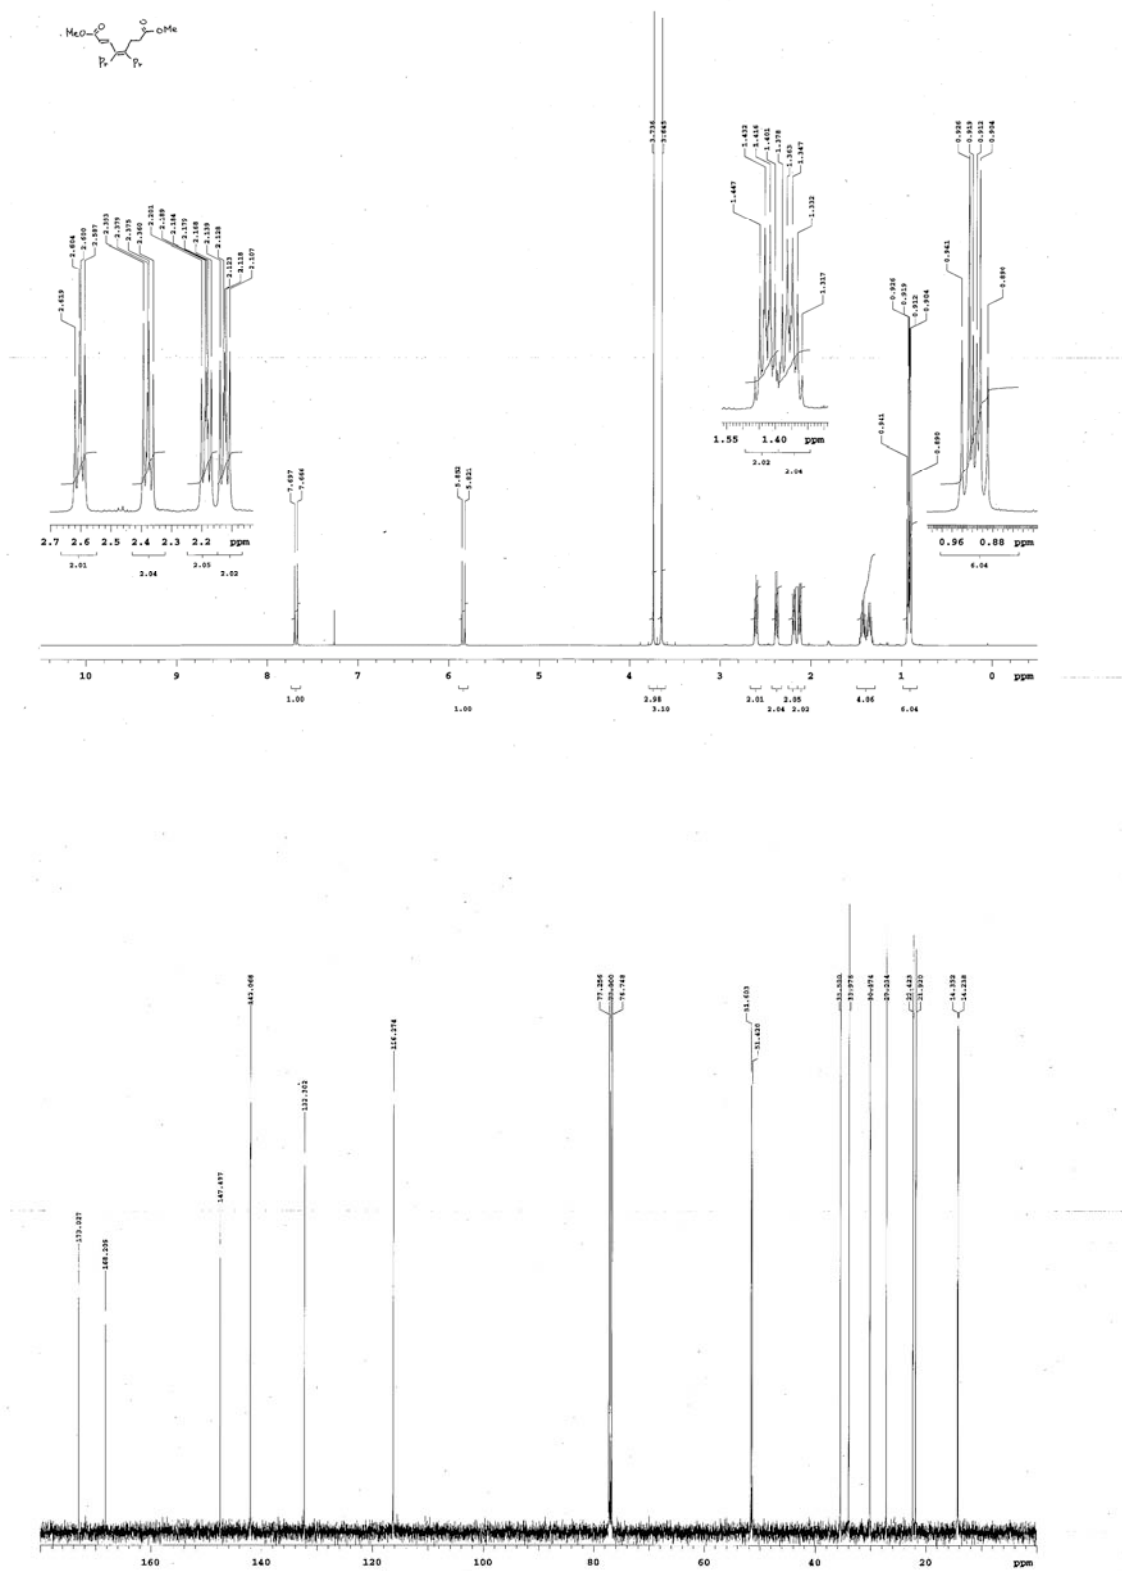

3ca

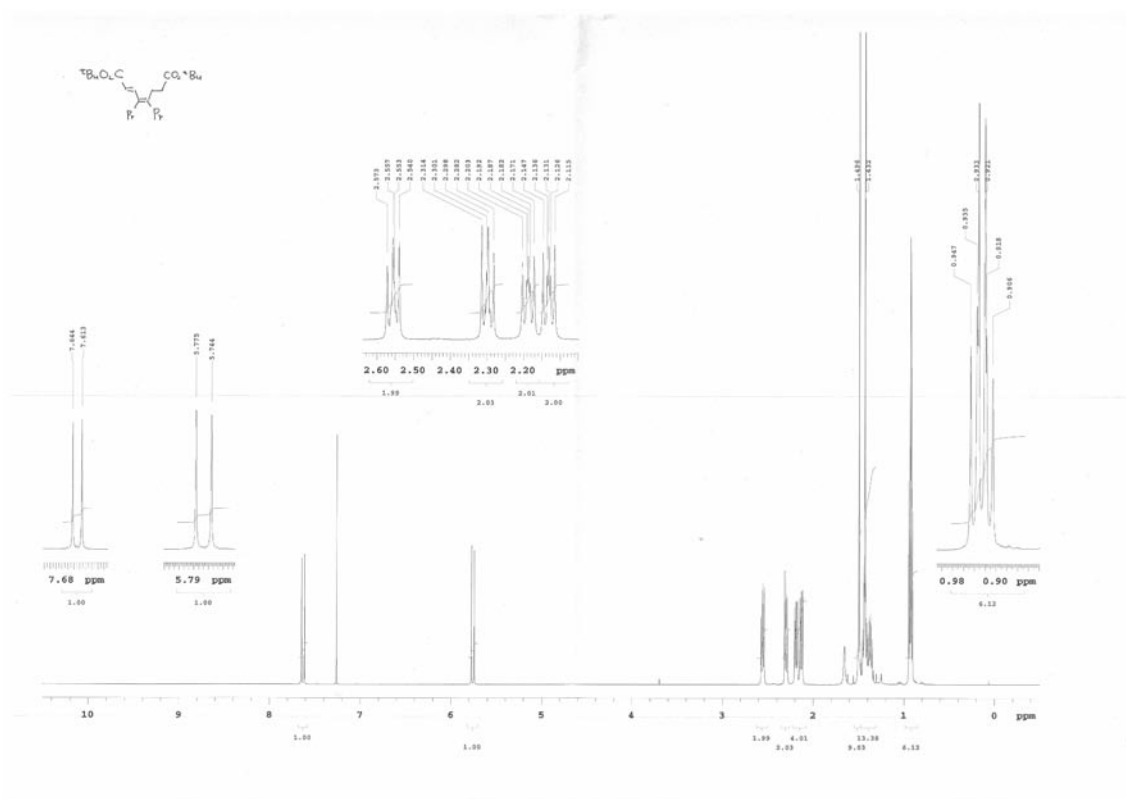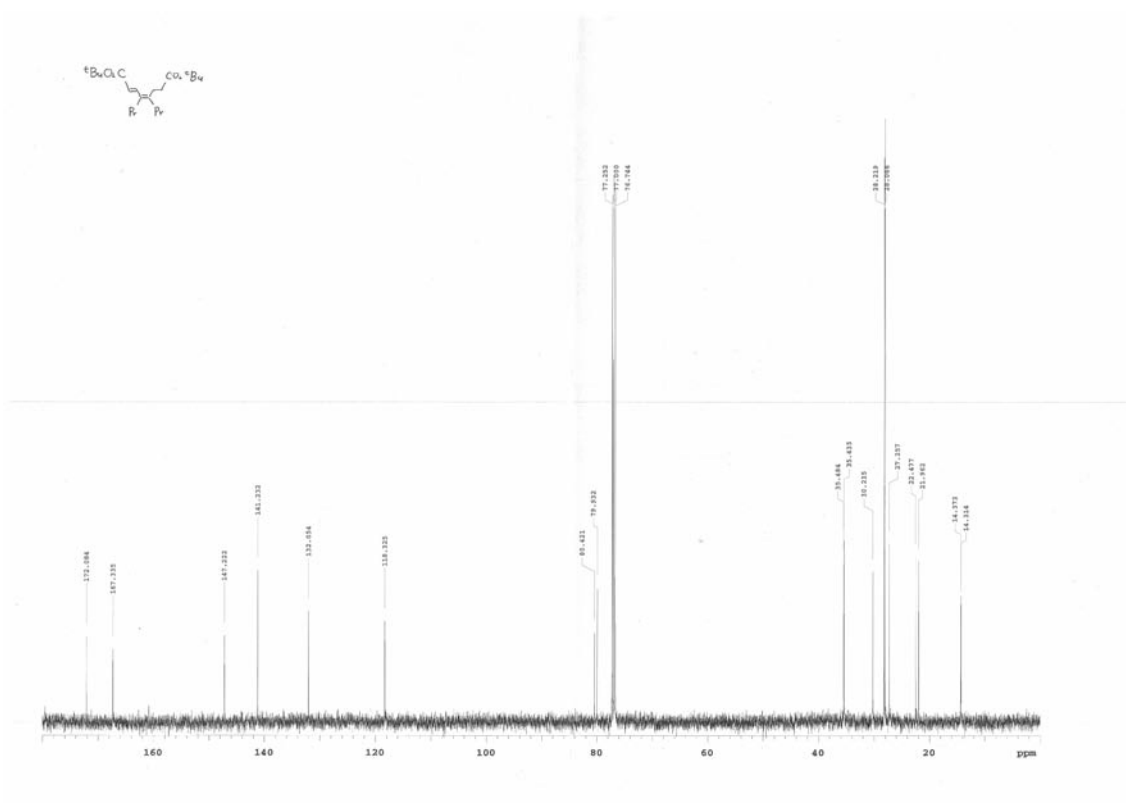



3ab

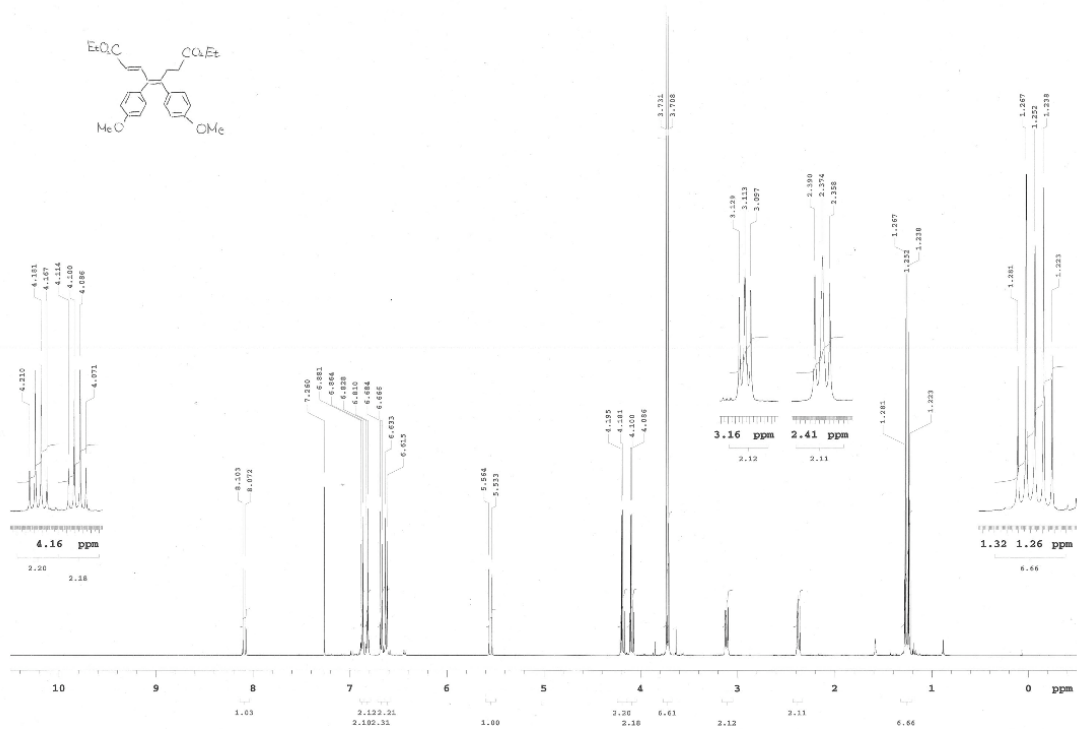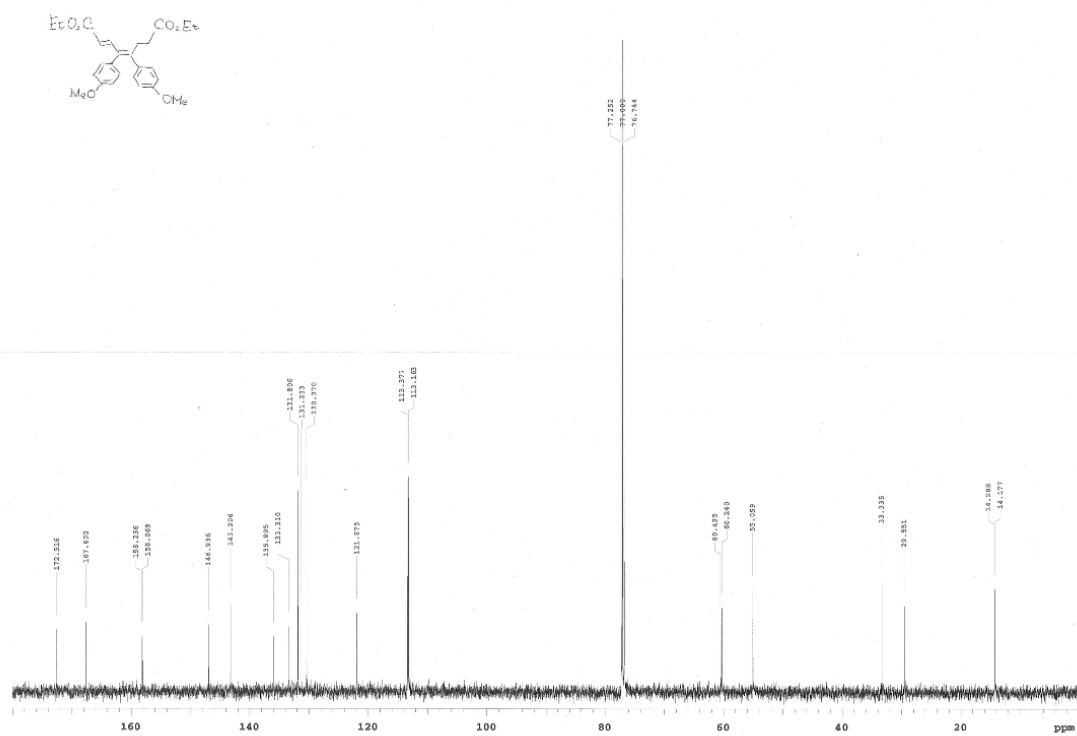



**3ad**

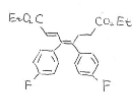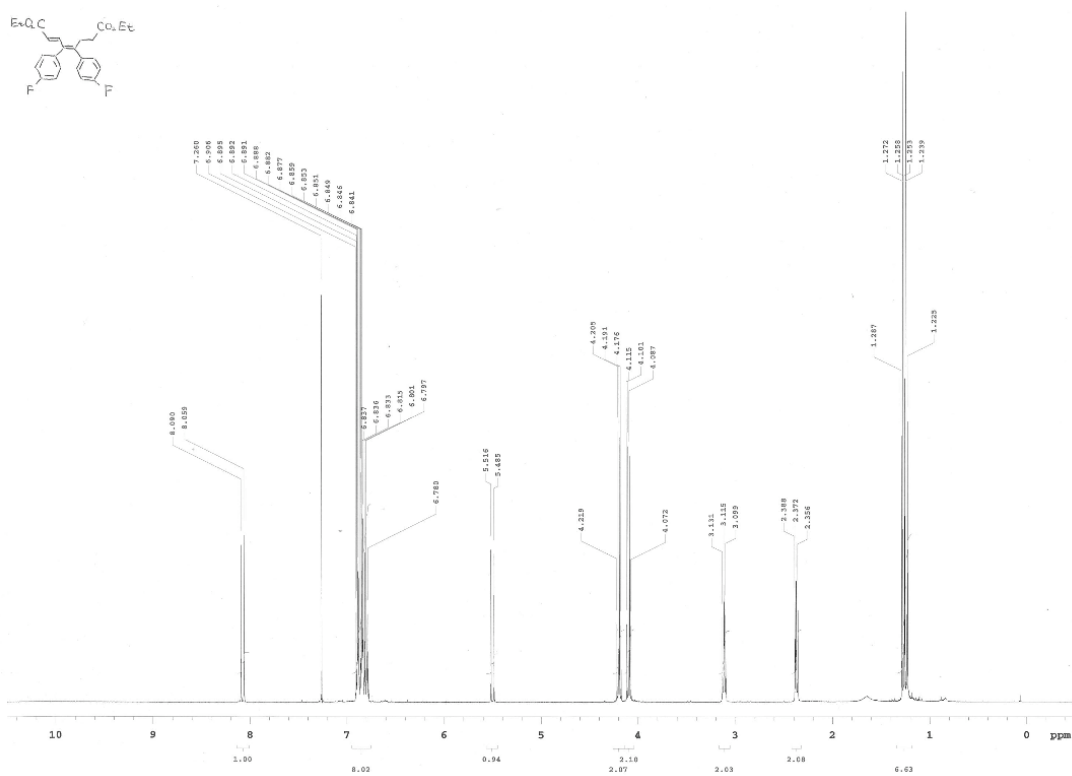





3ag

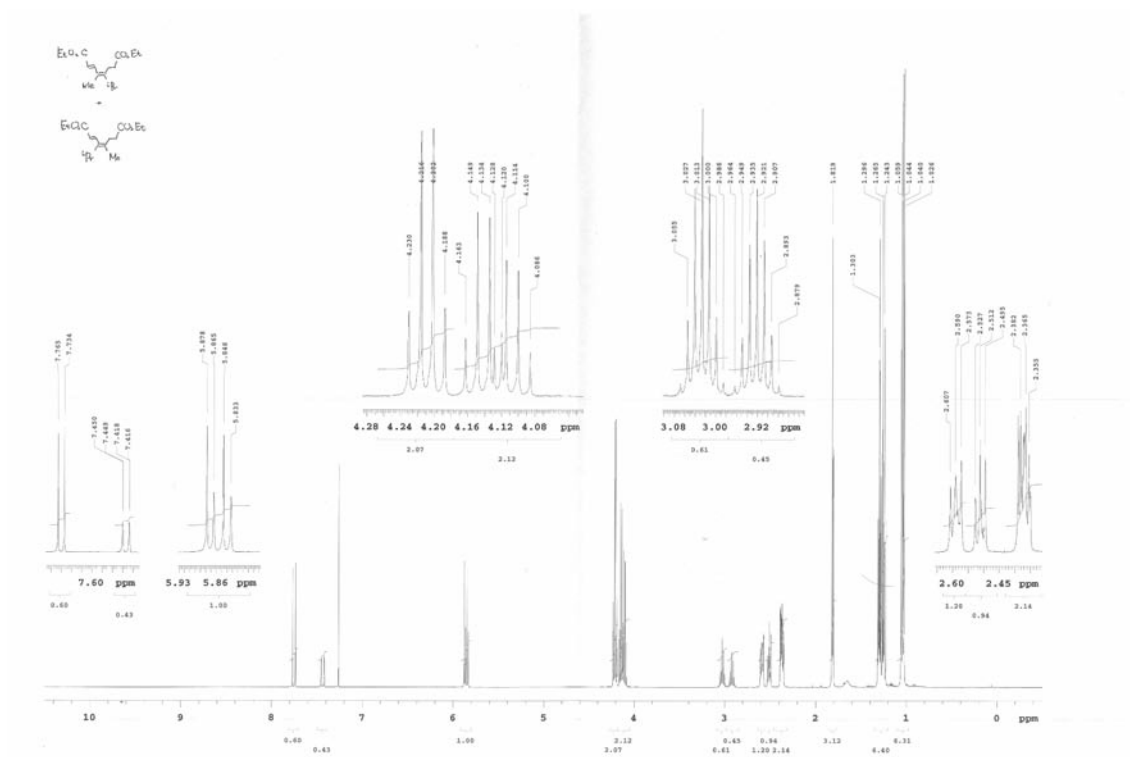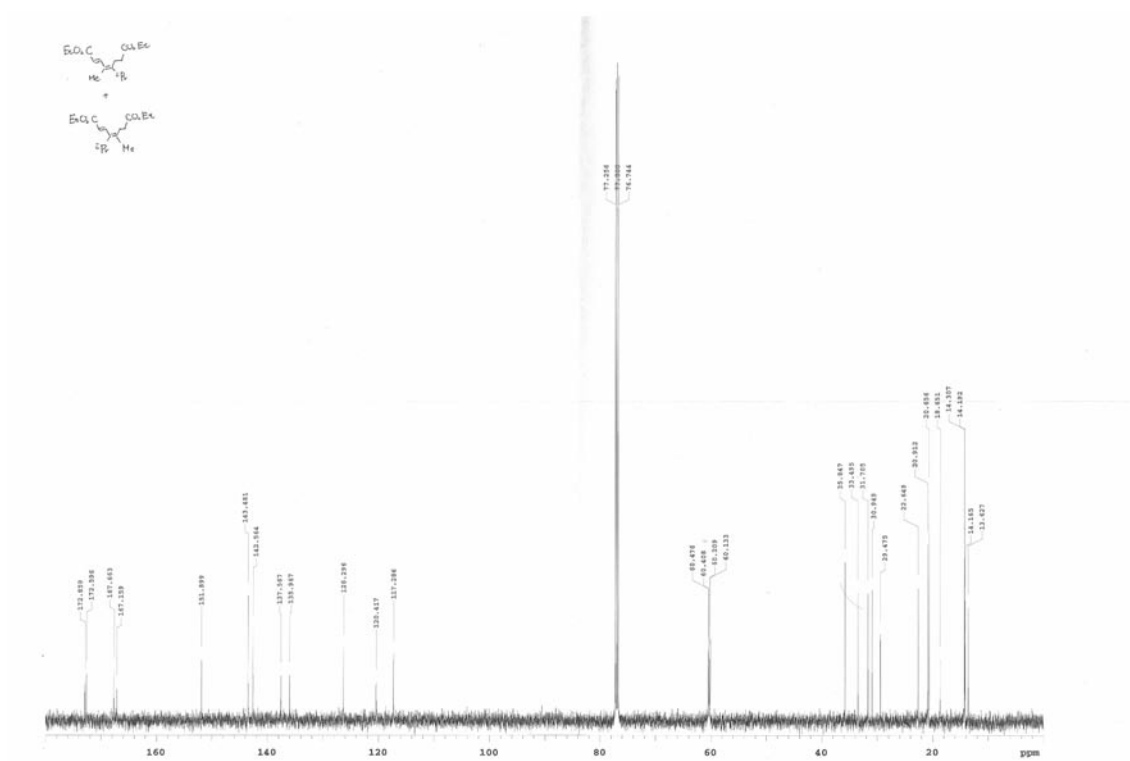

3ah

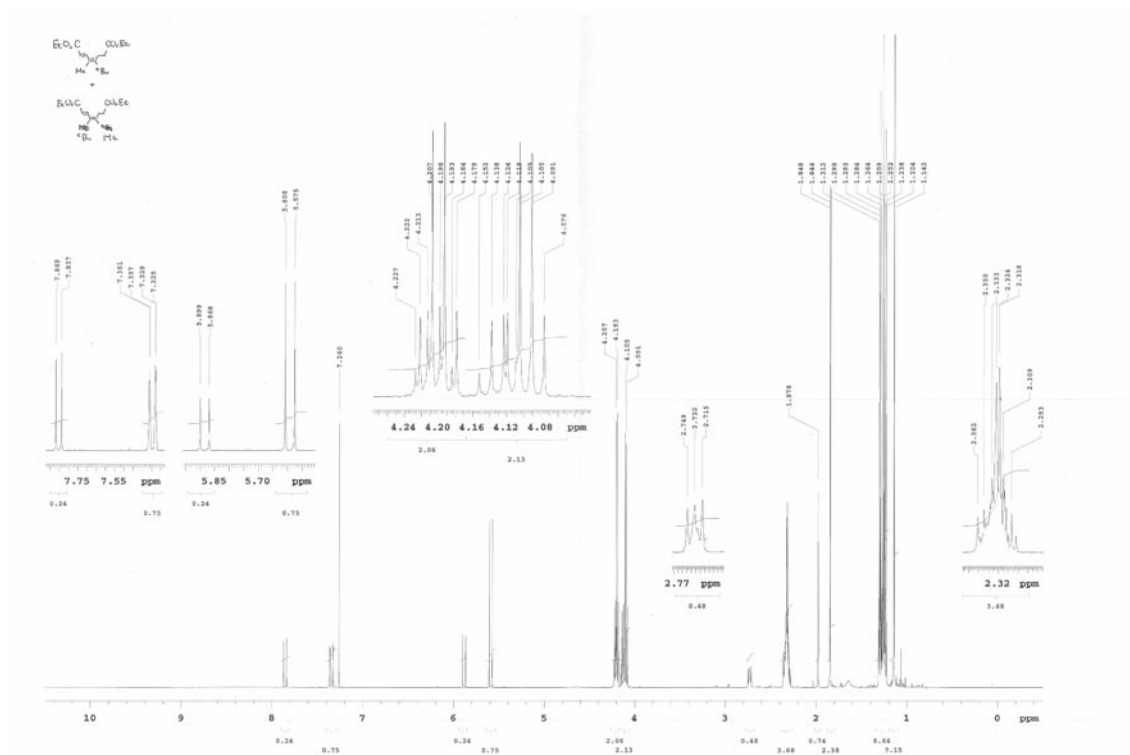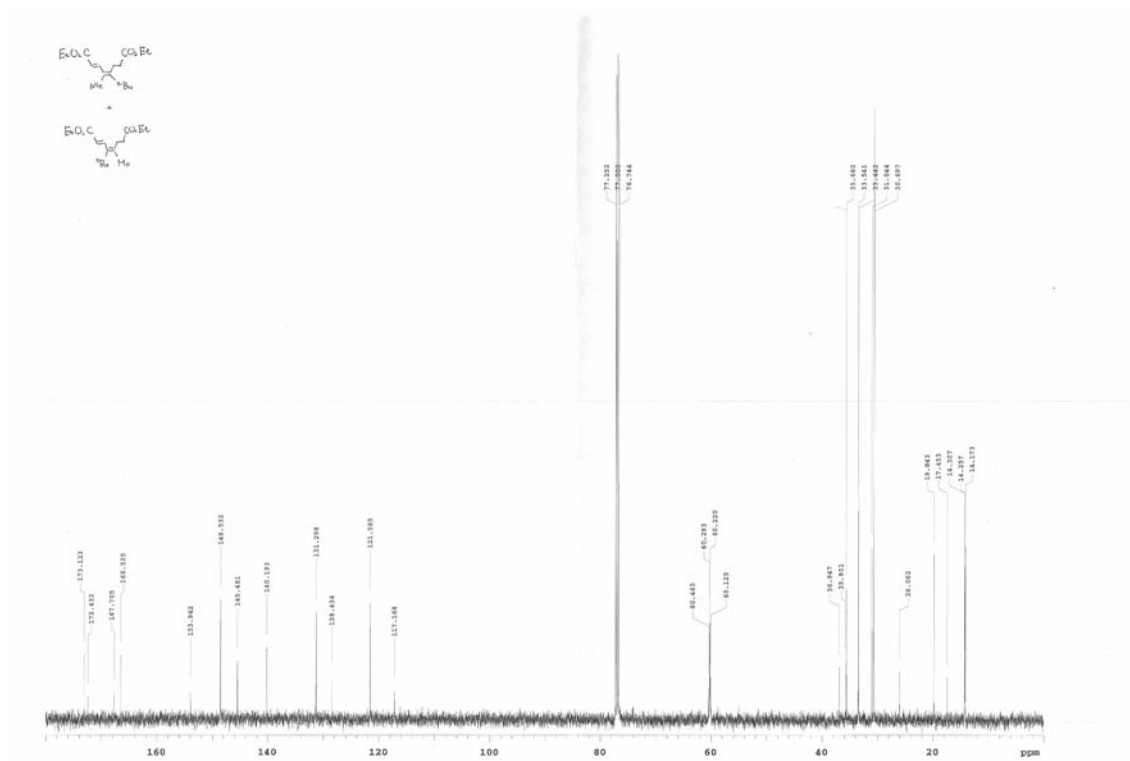

4aa

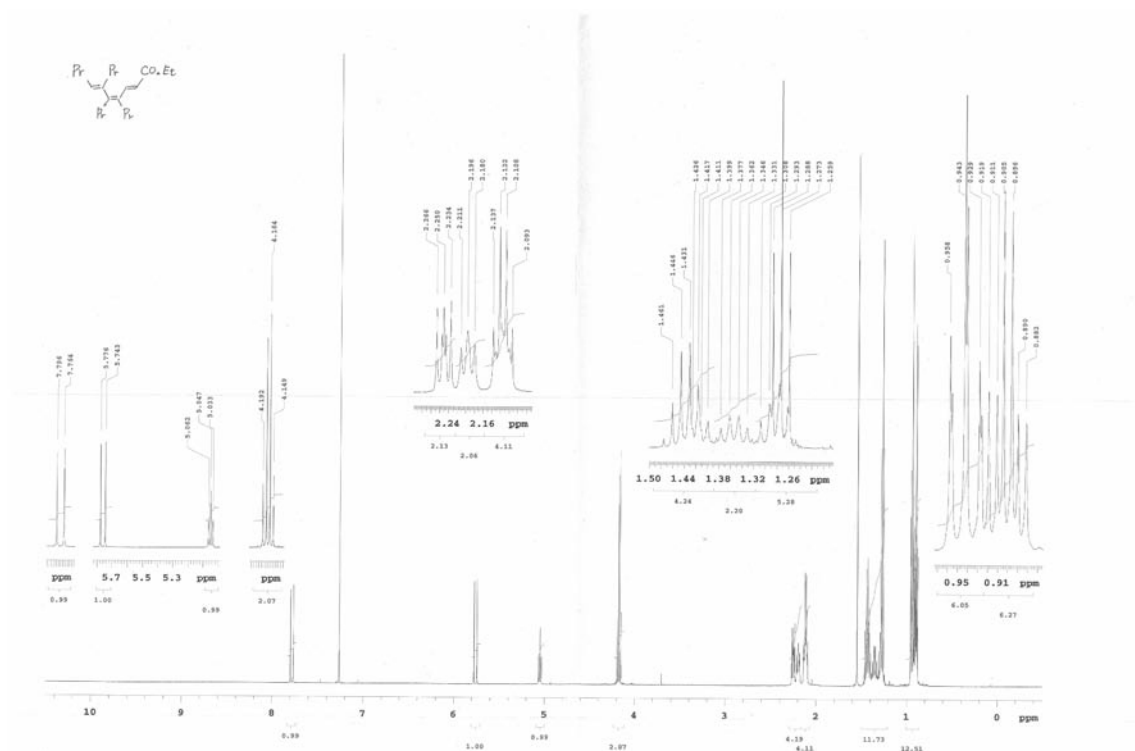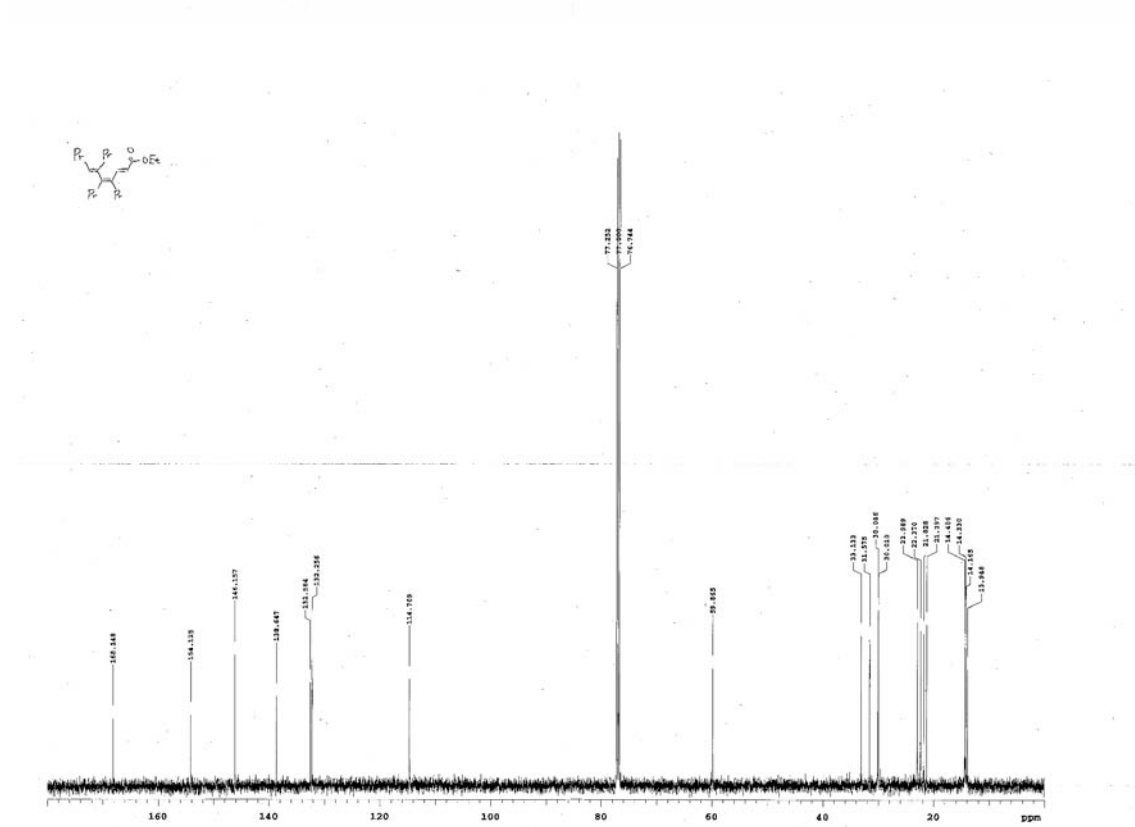





4ca

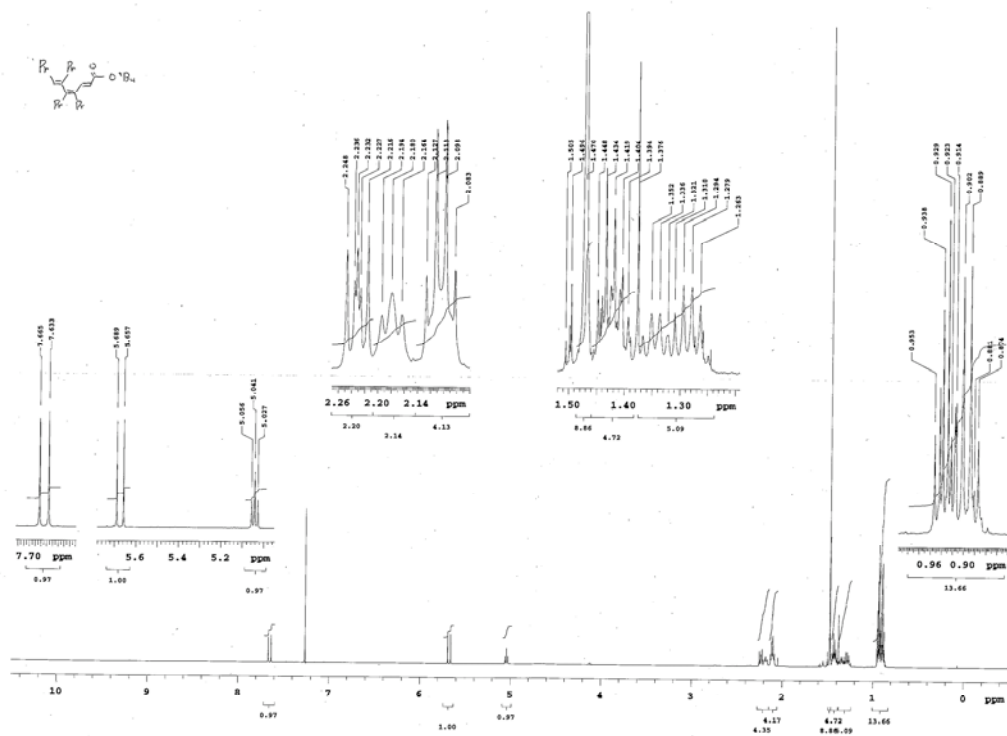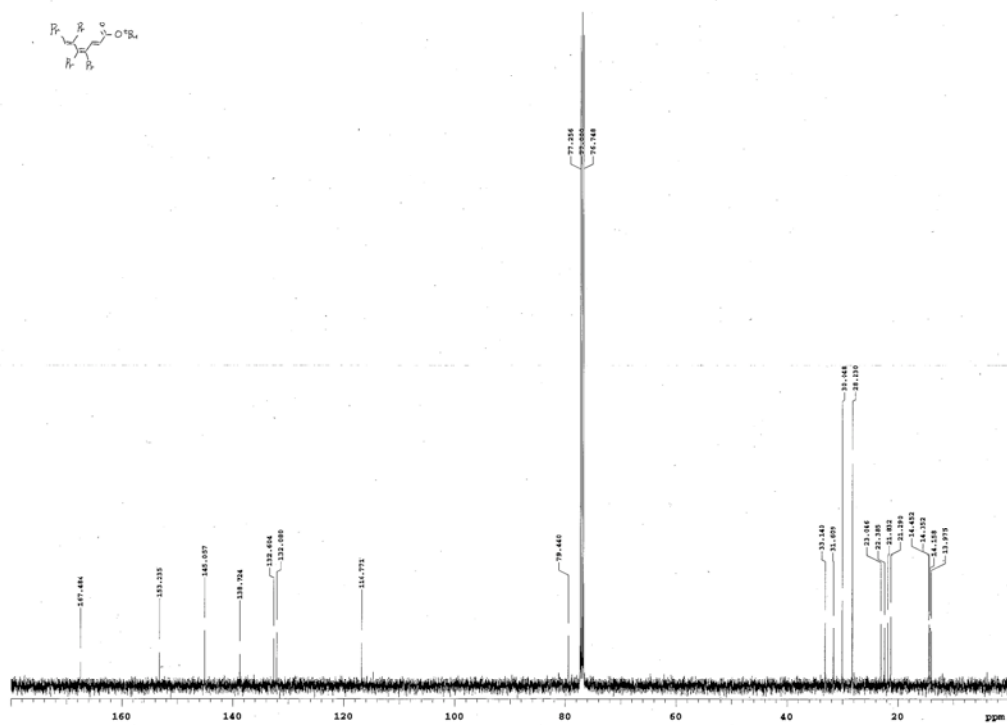



4ea

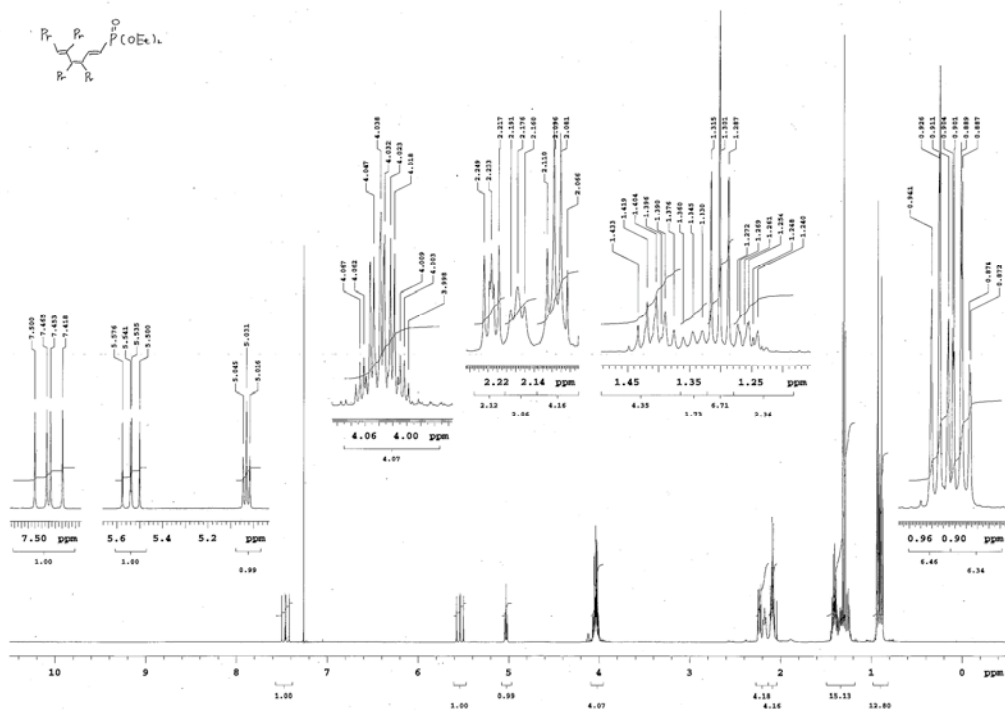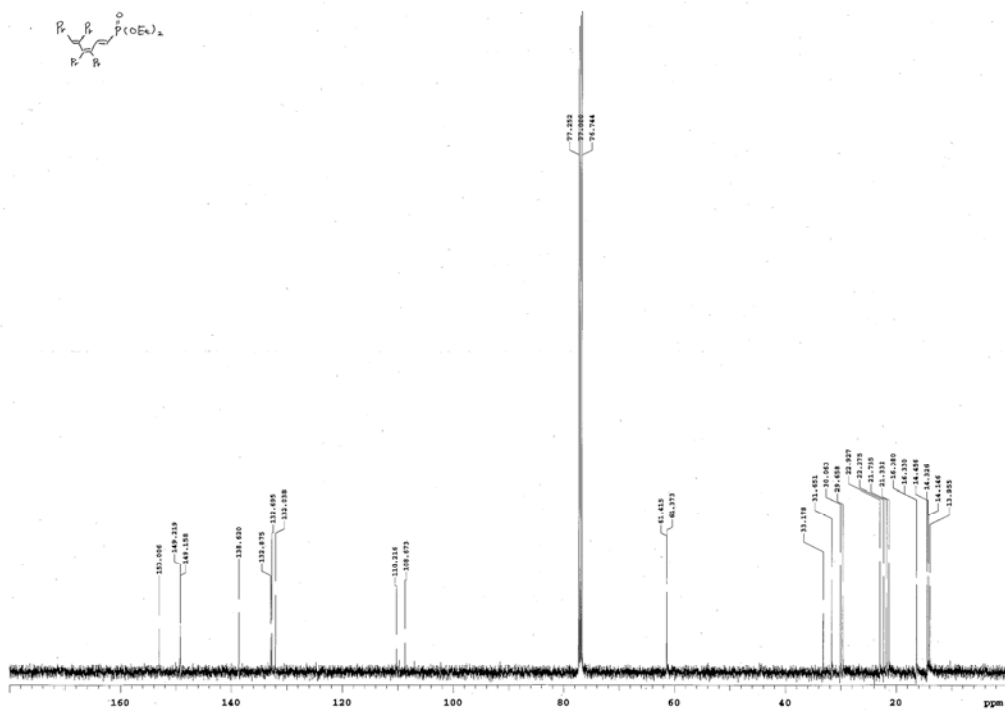

4fa

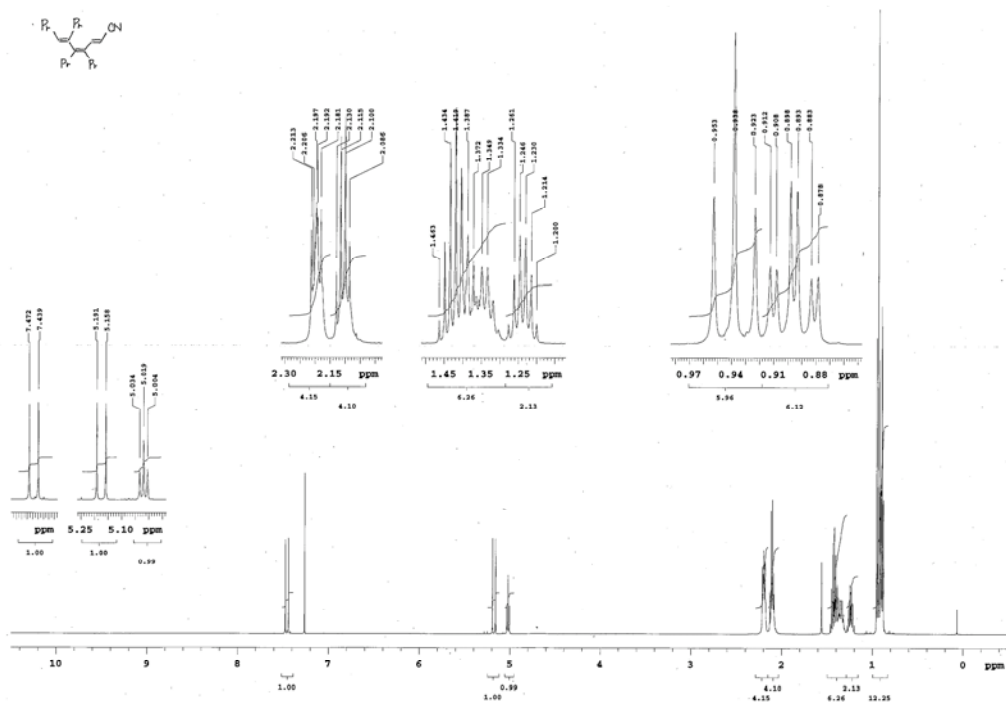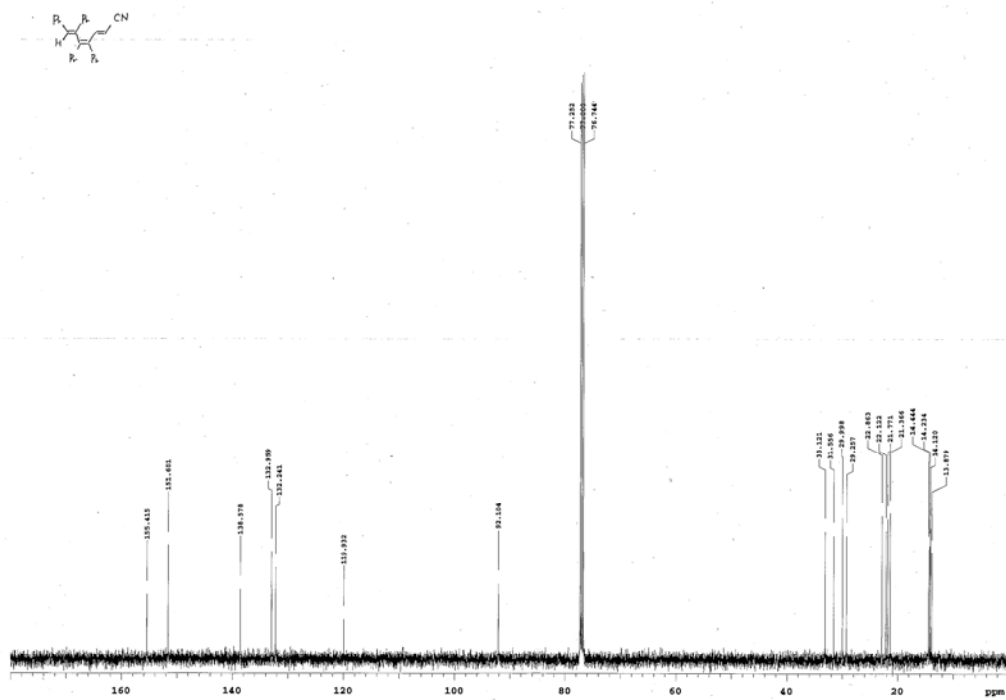











4de

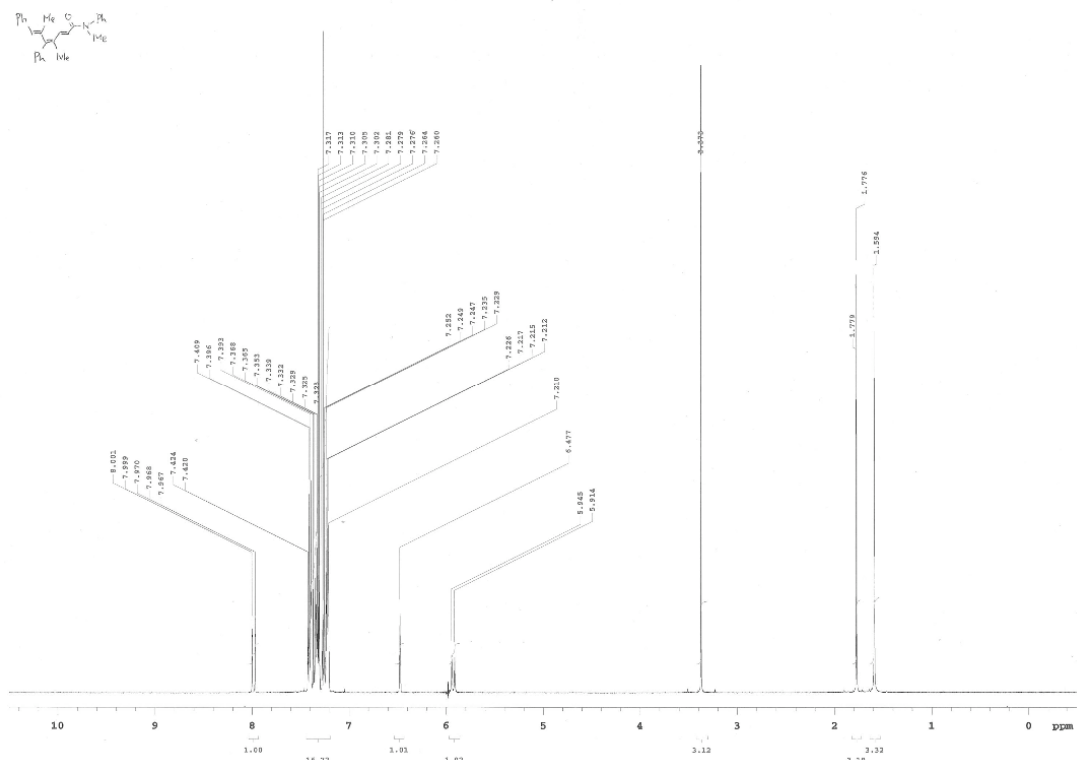

**Table S1.** Optimization of a Ligand for Cotrimerization between Two Molecules of Acrylates and One Alkyne to Afford 1,3-Diene **3**.<sup>a</sup>

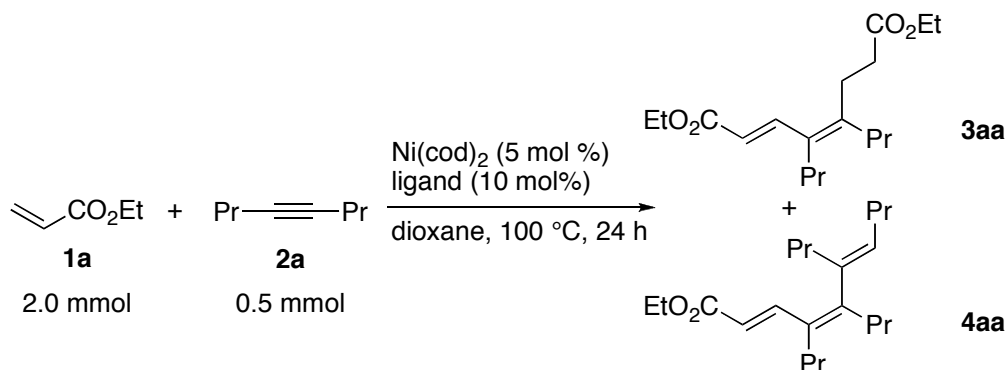

| entry | ligand                                               | yield (%) | <b>3aa</b> <sup>b</sup> | <b>4aa</b> <sup>c</sup> |
|-------|------------------------------------------------------|-----------|-------------------------|-------------------------|
| 1     | IPr (5 mol%)                                         |           | 19                      | 6                       |
| 2     | IPr (7.5 mol%)                                       |           | 93                      | 6                       |
| 3     | IPr (10 mol%)                                        |           | 99                      | <1                      |
| 4     | IPr (15 mol%)                                        |           | 98                      | <2                      |
| 5     | IMes                                                 |           | 51                      | 21                      |
| 6     |                                                      |           | 7                       | 29                      |
| 7     |                                                      |           | 6                       | 22                      |
| 8     |                                                      |           | <1                      | 23                      |
| 9     | PCy <sub>3</sub>                                     |           | 19                      | 68                      |
| 10    | PPh <sub>3</sub>                                     |           | 8                       | 78                      |
| 11    | P(4-MeO-C <sub>6</sub> H <sub>4</sub> ) <sub>3</sub> |           | 12                      | 70                      |

<sup>a</sup>Reactions were carried out using Ni(cod)<sub>2</sub> (5 mol %), ligand (10 mol %), **1** (2.0 mmol, 2.0 equiv.), and **2** (0.5 mmol) in 2 mL of dioxane at 100 °C for 24 h. <sup>b</sup>Yields base on alkyne **2a**. <sup>c</sup>NMR yields.

**Table S2.** Optimization of a Ligand for Cotrimerization between an Acrylate and Two Molecules of Alkynes to Afford 1,3,5-Triene **4**.<sup>a</sup>

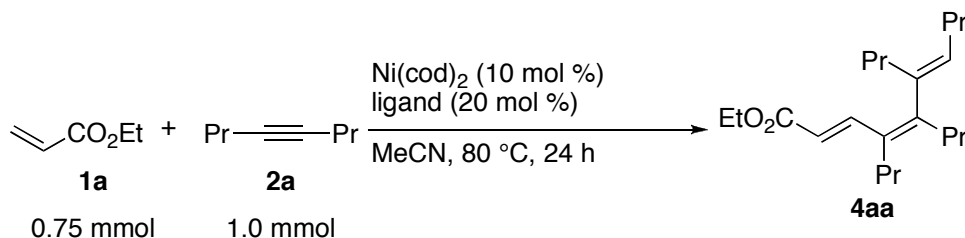

| entry | ligand                                               | yield (%) | <b>4aa</b> <sup>b</sup> |
|-------|------------------------------------------------------|-----------|-------------------------|
| 1     | PBu <sub>3</sub>                                     |           | 45                      |
| 2     | PCy <sub>3</sub>                                     |           | 79                      |
| 3     | PtBu <sub>3</sub>                                    |           | 6                       |
| 4     | PPh <sub>3</sub>                                     |           | 75                      |
| 5     | P(4-MeO-C <sub>6</sub> H <sub>4</sub> ) <sub>3</sub> |           | 92                      |
| 6     | P(4-MeO-C <sub>6</sub> H <sub>4</sub> ) <sub>3</sub> |           | 81 <sup>c</sup>         |
| 7     | P(2-MeO-C <sub>6</sub> H <sub>4</sub> ) <sub>3</sub> |           | 24                      |
| 8     | P(4-F-C <sub>6</sub> H <sub>4</sub> ) <sub>3</sub>   |           | 15                      |
| 9     | dppe (10 mol%)                                       |           | 17                      |
| 10    | dppf (10 mol%)                                       |           | 13                      |

<sup>a</sup>Reactions were carried out using Ni(cod)<sub>2</sub> (10 mol %), ligand (20 mol %), **1** (0.75 mmol, 1.5 equiv.), and **2** (1.0 mmol) in 2 mL of MeCN at 80 °C for 24 h. <sup>b</sup>Yields based on alkyne **2a**. <sup>c</sup>Reactions was carried out using **1** (4.0 mmol, 8 equiv.), and **2** (1.0 mmol).
